# Supplementary material for: Noncoding AUG circRNAs constitute an abundant and conserved subclass of circles
Source: Life Sci Alliance. 2019 Apr 26;2(3):e201900398. doi: 10.26508/lsa.201900398 (PMC6487579; doi:10.26508/lsa.201900398)
Supplement: Supplementary file 4 [file LSA-2019-00398_TableS4.xlsx]

## Sheet: Human (hg19) - DHX9
chr	start	end	names	total_junction	strand	annotation
chr4	144464661	144465125	SMARCA5	4295	+	Other circRNA
chr11	33307958	33309057	HIPK3	3081	+	AUG circRNA
chr9	138773478	138774924	CAMSAP1	3058	-	Ambiguous circRNA
chr4	178274461	178274882	NEIL3	2555	+	Other circRNA
chr14	97299803	97327072	VRK1	2335	+	AUG circRNA
chr14	99924615	99932150	SETD3	2290	-	AUG circRNA
chr22	21288066	21288532	CRKL	2207	+	Other circRNA
chr11	130130750	130131824	ZBTB44	1863	-	Ambiguous circRNA
chr12	120592773	120593523	GCN1L1	1823	-	Other circRNA
chr5	68470703	68471364	CCNB1	1804	+	Other circRNA
chr7	128845043	128846428	SMO	1794	+	Other circRNA
chr7	99621041	99621930	ZKSCAN1	1797	+	AUG circRNA
chr17	7402357	7402810	POLR2A	1769	+	Other circRNA
chr2	55209650	55214834	RTN4	1713	-	Other circRNA
chr17	59853761	59857762	BRIP1	1603	-	Ambiguous circRNA
chr6	4891946	4892613	CDYL	1561	+	Ambiguous circRNA
chr22	28692185	28693840	TTC28	1544	-	Other circRNA
chr12	1345934	1399178	ERC1	1523	+	Ambiguous circRNA
chr6	79752559	79770535	PHIP	1512	-	Other circRNA
chr10	112356155	112358048	SMC3	1466	+	Other circRNA
chr12	70193988	70195501	RAB3IP	1460	+	Other circRNA
chr12	109046047	109048186	CORO1C	1452	-	Other circRNA
chr19	5604593	5604947	SAFB2	1421	-	Other circRNA
chr19	30476129	30477324	URI1|C19orf2	1397	+	Other circRNA
chr15	67524151	67529158	AAGAB	1379	-	Ambiguous circRNA
chr7	128655032	128658211	TNPO3	1383	-	Ambiguous circRNA
chrX	130883333	130928494	LOC286467	1364	-	Other circRNA
chr3	142455220	142467302	TRPC1	1341	+	Other circRNA
chr5	122881110	122893258	CSNK1G3	1283	+	AUG circRNA
chr20	30954186	30956926	ASXL1	1276	+	Ambiguous circRNA
chr19	18650180	18650530	FKBP8	1258	-	Other circRNA
chr10	126631025	126631876	ZRANB1	1268	+	Other circRNA
chr5	619104	620376	CEP72	1248	+	Ambiguous circRNA
chr6	107824860	107827631	SOBP	1255	+	Other circRNA
chr10	70227879	70229920	DNA2	1172	-	Ambiguous circRNA
chr15	41961025	41962156	MGA	1187	+	AUG circRNA
chr2	148653869	148657467	ACVR2A	1167	+	Other circRNA
chr6	90461149	90463341	MDN1	1133	-	Other circRNA
chr22	46125304	46136418	ATXN10	1150	+	Other circRNA
chr13	33091993	33101669	N4BP2L2	1115	-	Ambiguous circRNA
chr10	7318853	7327916	SFMBT2	1113	-	Other circRNA
chr22	42204878	42206295	CCDC134	1097	+	AUG circRNA
chr3	157839891	157841780	RSRC1	1106	+	AUG circRNA
chr5	72370568	72373320	FCHO2	1093	+	Ambiguous circRNA
chr4	88116475	88116842	KLHL8	1071	-	Ambiguous circRNA
chr12	12397195	12397589	LRP6	1079	-	Other circRNA
chr8	52773404	52773806	PCMTD1	1066	-	AUG circRNA
chr5	167915606	167921655	RARS	1030	+	Ambiguous circRNA
chr5	78734832	78752841	HOMER1	1042	-	Other circRNA
chr10	27458872	27460012	MASTL	998	+	Ambiguous circRNA
chr8	128902834	128903244	PVT1	1022	+	Other circRNA
chr14	31346777	31349940	COCH	1014	+	Other circRNA
chr5	95091099	95099324	RHOBTB3	1002	+	Other circRNA
chr5	124036706	124036962	ZNF608	1007	-	Ambiguous circRNA
chr1	31465236	31468067	PUM1	991	-	Other circRNA
chr7	148543561	148544397	EZH2	982	-	Ambiguous circRNA
chr10	7285519	7327916	SFMBT2	973	-	Other circRNA
chr1	29481207	29481422	SRSF4	942	-	Other circRNA
chr21	46548316	46554747	ADARB1	926	+	Other circRNA
chr1	1158623	1159348	SDF4	901	-	Ambiguous circRNA
chr4	113483526	113506881	C4orf21	868	-	Ambiguous circRNA
chr1	155646338	155649303	YY1AP1	861	-	Ambiguous circRNA
chr9	88233897	88248289	AGTPBP1	858	-	Other circRNA
chr18	19345732	19359646	MIB1	859	+	Ambiguous circRNA
chr6	158733082	158735300	TULP4	851	+	AUG circRNA
chr2	61749745	61761038	XPO1	837	-	Ambiguous circRNA
chr6	84108085	84117620	ME1	833	-	Other circRNA
chr6	137015277	137019820	MAP3K5	827	-	Other circRNA
chr8	37623043	37623873	PROSC	830	+	Other circRNA
chr6	87925620	87928449	ZNF292	831	+	Other circRNA
chr4	22403053	22404422	GPR125	811	-	Other circRNA
chr16	1004356	1004666	LMF1	826	-	Ambiguous circRNA
chr21	37619814	37620866	DOPEY2	776	+	Other circRNA
chrX	153996576	153997585	DKC1	737	+	Other circRNA
chr1	35824525	35827390	ZMYM4	749	+	Ambiguous circRNA
chr18	74561481	74563895	ZNF236	734	+	Ambiguous circRNA
chr14	21971315	21972024	METTL3	730	-	Ambiguous circRNA
chr21	30693541	30702014	BACH1	736	+	Ambiguous circRNA
chr15	101906400	101910728	PCSK6	718	-	Other circRNA
chr11	61205096	61205585	SDHAF2	703	+	Other circRNA
chr19	34921480	34929671	UBA2	704	+	Ambiguous circRNA
chr20	57014000	57016139	VAPB	701	+	Ambiguous circRNA
chr5	179688683	179707608	MAPK9	701	-	AUG circRNA
chr9	33953282	33963789	UBAP2	685	-	Ambiguous circRNA
chr14	66028054	66028484	FUT8	695	+	Ambiguous circRNA
chr5	10415599	10417516	MARCH6	687	+	Other circRNA
chr5	138699447	138700432	PAIP2	670	+	AUG circRNA
chr4	178274461	178281831	NEIL3	669	+	Other circRNA
chr4	187627716	187630999	FAT1	671	-	AUG circRNA
chr7	135262543	135277940	NUP205	661	+	Other circRNA
chr19	47865732	47865950	DHX34	656	+	Other circRNA
chr12	69983264	69987393	CCT2	658	+	Other circRNA
chr12	69983264	69985939	CCT2	655	+	Other circRNA
chr21	30698379	30702014	BACH1	652	+	Ambiguous circRNA
chr7	100410368	100410830	EPHB4	648	-	Other circRNA
chr19	18648410	18649246	FKBP8	649	-	Other circRNA
chr1	35846859	35847359	ZMYM4	639	+	Other circRNA
chr1	225140371	225195246	DNAH14	655	+	AUG circRNA
chr9	98740342	98766983	C9orf102	655	+	Other circRNA
chr19	45766370	45766625	MARK4	637	+	Other circRNA
chr2	172782046	172809519	HAT1	643	+	Ambiguous circRNA
chrX	53641494	53641706	HUWE1	627	-	Other circRNA
chr8	142264087	142264728	SLC45A4	639	-	AUG circRNA
chr10	5836847	5842668	GDI2	630	-	Other circRNA
chr16	3900297	3901010	CREBBP	632	-	Other circRNA
chr21	47768925	47769734	PCNT	626	+	Ambiguous circRNA
chr7	156619298	156629579	LMBR1	618	-	Ambiguous circRNA
chr1	16199310	16203173	SPEN	621	+	Other circRNA
chr7	24663284	24708279	MPP6	612	+	AUG circRNA
chr1	231672958	231678357	TSNAX|DISC1	591	+	Ambiguous circRNA
chr1	225140371	225161855	DNAH14	604	+	AUG circRNA
chr10	116879948	116889297	ATRNL1	598	+	Ambiguous circRNA
chr9	128099296	128099870	GAPVD1	590	+	Other circRNA
chr18	12999419	13019205	CEP192	579	+	AUG circRNA
chr1	1192371	1192690	UBE2J2	568	-	Other circRNA
chr12	124071293	124074996	TMED2	575	+	Other circRNA
chr11	92085261	92088570	FAT3	579	+	AUG circRNA
chr20	60714130	60716000	PSMA7	571	-	Other circRNA
chr5	32135677	32143986	GOLPH3	566	-	Other circRNA
chr2	122363276	122363756	CLASP1	567	-	Ambiguous circRNA
chr17	59996760	60002460	INTS2	559	-	Other circRNA
chr9	111812562	111812972	C9orf5	542	-	Ambiguous circRNA
chr16	68155889	68160513	NFATC3	549	+	Ambiguous circRNA
chr5	6604250	6605521	NSUN2	548	-	Other circRNA
chr9	96233422	96261168	FAM120A	551	+	Other circRNA
chr17	59821792	59857762	BRIP1	541	-	Ambiguous circRNA
chr6	159004985	159010814	TMEM181	542	+	Other circRNA
chr2	37543379	37544322	PRKD3	540	-	AUG circRNA
chr12	28458581	28460682	CCDC91	534	+	Ambiguous circRNA
chr16	30740286	30740893	SRCAP	532	+	Ambiguous circRNA
chr9	96233422	96238620	FAM120A	540	+	Other circRNA
chr10	105767934	105778666	SLK	530	+	Other circRNA
chr3	196831773	196846401	DLG1	538	-	Ambiguous circRNA
chr19	13039155	13039661	FARSA	533	-	Other circRNA
chr7	152007050	152012423	MLL3	531	-	Other circRNA
chr7	140055467	140058585	SLC37A3	525	-	Other circRNA
chr6	13639794	13644961	RANBP9	522	-	Ambiguous circRNA
chr5	74130250	74137504	FAM169A	528	-	AUG circRNA
chr19	41089303	41089623	SHKBP1	520	+	Other circRNA
chr5	176370335	176385155	UIMC1	521	-	Other circRNA
chr10	70218860	70229920	DNA2	516	-	Ambiguous circRNA
chr4	1219147	1235307	CTBP1	524	-	AUG circRNA
chr12	46622935	46637097	SLC38A1	522	-	AUG circRNA
chr17	80521229	80526077	FOXK2	522	+	Other circRNA
chr19	17212469	17213367	MYO9B	520	+	AUG circRNA
chr13	96409897	96416207	DNAJC3	518	+	Other circRNA
chr1	155823066	155823597	GON4L	506	-	Ambiguous circRNA
chr8	18656804	18662408	PSD3	506	-	Ambiguous circRNA
chr17	20107645	20109225	SPECC1	512	+	Other circRNA
chr5	137320945	137324004	FAM13B	498	-	Other circRNA
chr14	39648294	39648666	PNN	497	+	Other circRNA
chr9	86292641	86293514	UBQLN1	504	-	Other circRNA
chr9	95018961	95032265	IARS	504	-	Other circRNA
chr16	89961445	89967202	TCF25	495	+	Other circRNA
chr11	36248634	36248980	LDLRAD3	503	+	Other circRNA
chr21	37775055	37783902	CHAF1B	495	+	Other circRNA
chr16	30715384	30715636	SRCAP	494	+	Other circRNA
chr16	4311779	4312702	TFAP4	484	-	Other circRNA
chr19	17387303	17387718	BABAM1	486	+	Ambiguous circRNA
chr15	74963795	74967483	EDC3	493	-	AUG circRNA
chr19	50902107	50902741	POLD1	481	+	Ambiguous circRNA
chr4	56277780	56284152	TMEM165	488	+	Other circRNA
chr7	155465560	155473602	RBM33	485	+	Other circRNA
chr4	4650703	4651269	LOC100507266	484	+	Other circRNA
chr1	41536266	41541123	SCMH1	485	-	Ambiguous circRNA
chr1	65830317	65831879	DNAJC6	477	+	Ambiguous circRNA
chr2	208841374	208842310	PLEKHM3	473	-	Other circRNA
chr2	203329531	203332412	BMPR2	475	+	Other circRNA
chr9	95030455	95032265	IARS	460	-	Other circRNA
chr17	47388673	47390207	ZNF652	454	-	Ambiguous circRNA
chr7	43679047	43680248	C7orf44	465	-	Other circRNA
chr3	47466974	47470160	SCAP	456	-	Other circRNA
chr9	113734352	113735838	LPAR1	465	-	AUG circRNA
chr1	23356961	23377013	KDM1A	464	+	Other circRNA
chr1	9991948	9994918	LZIC	457	-	Other circRNA
chr1	33413822	33415375	RNF19B	451	-	Other circRNA
chr7	42187824	42188067	GLI3	454	-	Ambiguous circRNA
chr8	99718694	99719539	STK3	463	-	Other circRNA
chr21	17135209	17138460	USP25	450	+	Other circRNA
chr2	206992520	206994966	NDUFS1	444	-	Other circRNA
chr8	18622958	18662408	PSD3	449	-	Ambiguous circRNA
chr19	37689840	37698156	ZNF585B	435	-	Ambiguous circRNA
chr6	30618770	30619243	C6orf136	433	+	Other circRNA
chr17	45695715	45696530	NPEPPS	438	+	Other circRNA
chr1	46032240	46032692	AKR1A1	429	+	Other circRNA
chr22	46085591	46098727	ATXN10	440	+	Ambiguous circRNA
chr10	5827104	5842668	GDI2	435	-	Other circRNA
chr2	200233327	200298237	SATB2	435	-	Other circRNA
chr17	54926056	54933986	DGKE	429	+	Other circRNA
chr2	72945231	72960247	EXOC6B	433	-	Other circRNA
chr6	13579682	13584457	SIRT5	426	+	Ambiguous circRNA
chr5	60768507	60768864	ZSWIM6	428	+	Other circRNA
chr1	146757974	146759412	CHD1L	420	+	Ambiguous circRNA
chr21	17205666	17214859	USP25	420	+	Other circRNA
chr1	235643369	235658138	B3GALNT2	427	-	Other circRNA
chr14	102506572	102507010	DYNC1H1	428	+	Other circRNA
chr13	113170753	113181798	TUBGCP3	423	-	Other circRNA
chr16	69404385	69406258	TERF2	421	-	Other circRNA
chr3	56626997	56628056	CCDC66	424	+	Ambiguous circRNA
chr12	72020039	72022817	ZFC3H1	414	-	Other circRNA
chr19	3660963	3661999	PIP5K1C	421	-	Other circRNA
chr4	77055327	77065626	NUP54	419	-	Ambiguous circRNA
chr4	129913321	129925031	SCLT1	424	-	Other circRNA
chr7	40027197	40027857	CDK13	421	+	Other circRNA
chr3	31617887	31621588	STT3B	419	+	Other circRNA
chr18	196636	199316	USP14	410	+	Other circRNA
chr7	24663284	24690331	MPP6	413	+	AUG circRNA
chr3	169863210	169867032	PHC3	415	-	Other circRNA
chr15	41988272	41991357	MGA	415	+	Other circRNA
chr9	37424841	37426651	GRHPR	411	+	Ambiguous circRNA
chr15	78885433	78885970	CHRNA5	405	+	Other circRNA
chr6	47471015	47472494	CD2AP	405	+	Other circRNA
chr10	909682	910210	LARP4B	408	-	Other circRNA
chrX	53430497	53430825	SMC1A	403	-	Other circRNA
chr11	7334625	7335172	SYT9	404	+	Ambiguous circRNA
chr19	34922765	34929671	UBA2	407	+	Ambiguous circRNA
chr21	34804483	34805178	IFNGR2	401	+	Other circRNA
chr3	56694758	56707753	FAM208A	403	-	Other circRNA
chr3	49016914	49017929	ARIH2	394	+	Other circRNA
chr6	47251673	47254331	TNFRSF21	400	-	Other circRNA
chr5	38523520	38530768	LIFR	398	-	AUG circRNA
chr18	8718421	8720494	CCDC165	399	+	AUG circRNA
chr1	146747016	146757164	CHD1L	395	+	Ambiguous circRNA
chr8	37734626	37735069	RAB11FIP1	383	-	Other circRNA
chr1	233482187	233490757	KIAA1804	383	+	Other circRNA
chr2	239090705	239093928	ILKAP	385	-	Other circRNA
chr12	27521194	27533337	ARNTL2	373	+	Other circRNA
chr2	61712902	61717911	XPO1	381	-	Other circRNA
chr15	49528047	49531564	GALK2	386	+	Ambiguous circRNA
chr3	169854206	169867032	PHC3	382	-	Other circRNA
chr1	31465236	31479949	PUM1	381	-	Other circRNA
chr18	46858233	46906128	DYM	378	-	Other circRNA
chr22	46085591	46114373	ATXN10	380	+	Ambiguous circRNA
chr2	9048750	9098771	MBOAT2	377	-	Other circRNA
chr10	225933	267296	ZMYND11	376	+	AUG circRNA
chr17	57808781	57816308	VMP1	377	+	Ambiguous circRNA
chr7	72883846	72884813	BAZ1B	368	-	Other circRNA
chr5	65349233	65350779	ERBB2IP	358	+	Other circRNA
chr8	48192449	48206619	KIAA0146	370	+	Ambiguous circRNA
chr12	116668337	116675510	MED13L	368	-	Other circRNA
chr12	49491348	49491888	LMBR1L	361	-	Other circRNA
chr1	58971731	59002413	OMA1	365	-	Other circRNA
chr3	121215654	121217517	POLQ	361	-	Other circRNA
chr17	79813017	79813462	P4HB	362	-	Ambiguous circRNA
chrX	147743428	147744289	AFF2	364	+	Other circRNA
chr4	103225473	103236987	SLC39A8	362	-	Other circRNA
chr16	87782278	87795646	KLHDC4	361	-	Ambiguous circRNA
chr12	1399017	1481143	ERC1	361	+	Ambiguous circRNA
chr1	7837219	7838229	VAMP3	360	+	Other circRNA
chr19	40761064	40771258	AKT2	360	-	AUG circRNA
chr14	99723807	99724176	BCL11B	359	-	Other circRNA
chr2	207144263	207162097	ZDBF2	357	+	AUG circRNA
chrX	106331665	106332069	RBM41	353	-	Other circRNA
chr7	40027197	40041630	CDK13	361	+	Other circRNA
chr7	127013395	127017383	ZNF800	357	-	Ambiguous circRNA
chr2	63660878	63667005	WDPCP	352	-	Other circRNA
chr1	21083658	21100103	HP1BP3	349	-	Other circRNA
chr3	8977554	8983488	RAD18	354	-	Other circRNA
chrX	21869626	21871621	MBTPS2	341	+	Other circRNA
chr5	64863339	64868113	PPWD1	347	+	Other circRNA
chr13	100909848	100925600	PCCA	345	+	Other circRNA
chr12	133310970	133312098	ANKLE2	341	-	Other circRNA
chr1	51868106	51874004	EPS15	343	-	Other circRNA
chr5	137904613	137906830	HSPA9	340	-	Other circRNA
chr16	18852886	18856973	SMG1	341	-	Other circRNA
chr1	212218001	212220759	DTL	342	+	Ambiguous circRNA
chr19	11623870	11625036	ECSIT	338	-	Other circRNA
chr15	41036244	41037457	FAM82A2	334	-	Other circRNA
chr1	115005725	115007010	TRIM33	339	-	Other circRNA
chr17	60061531	60062451	MED13	334	-	Other circRNA
chr16	22360599	22361170	CDR2	333	-	Other circRNA
chr1	36213507	36214205	CLSPN	330	-	Other circRNA
chr3	129599151	129599402	TMCC1	336	-	Other circRNA
chr7	33185853	33217203	BBS9	333	+	Ambiguous circRNA
chr11	46515157	46529920	AMBRA1	331	-	Other circRNA
chr7	24663281	24708279	MPP6	330	+	AUG circRNA
chr3	128525214	128526514	RAB7A	328	+	Other circRNA
chr17	57430575	57430887	YPEL2	327	+	AUG circRNA
chr1	58971731	59004982	OMA1	324	-	AUG circRNA
chr6	77981056	77983024		326	-	Other circRNA
chr7	90355880	90356126	CDK14	322	+	Ambiguous circRNA
chr5	74109664	74137504	FAM169A	328	-	AUG circRNA
chrX	53641494	53642796	HUWE1	322	-	Other circRNA
chr17	45741524	45745776	KPNB1	320	+	Other circRNA
chr12	105321750	105322472	SLC41A2	317	-	AUG circRNA
chr4	3088665	3109150	HTT	317	+	Other circRNA
chr20	36685933	36694658	RPRD1B	321	+	Other circRNA
chrX	53672262	53681075	HUWE1	320	-	AUG circRNA
chr22	25771779	25777545	LRP5L	319	-	Other circRNA
chr6	90461149	90472249	MDN1	316	-	Other circRNA
chr9	20819794	20823114	KIAA1797	321	+	Other circRNA
chr7	156758963	156759786	NOM1	311	+	Other circRNA
chr14	35331249	35331528	BAZ1A	316	-	Other circRNA
chr11	62406454	62407203	GANAB	313	-	Ambiguous circRNA
chr12	70671911	70704797	CNOT2	313	+	AUG circRNA
chr17	45741524	45752148	KPNB1	311	+	Other circRNA
chr3	150834124	150845771	MED12L	315	+	Other circRNA
chr9	16727794	16738483	BNC2	311	-	Ambiguous circRNA
chr11	61133516	61135470	TMEM138	305	+	Ambiguous circRNA
chr1	8601272	8617582	RERE	313	-	Other circRNA
chr2	225400244	225422573	CUL3	310	-	Other circRNA
chr1	40654726	40668286	RLF	309	+	Other circRNA
chr6	13632601	13644961	RANBP9	311	-	Ambiguous circRNA
chr6	94066434	94068129	EPHA7	307	-	Other circRNA
chr1	26584087	26586293	CEP85	300	+	Other circRNA
chr16	68155889	68157024	NFATC3	309	+	Ambiguous circRNA
chr13	42439871	42442613	KIAA0564	308	-	Other circRNA
chrX	47705503	47755339	ZNF81	308	+	AUG circRNA
chr8	124349864	124351686	ATAD2	307	-	Ambiguous circRNA
chr4	39915230	39927553	PDS5A	302	-	Other circRNA
chr1	224377278	224378021	DEGS1	302	+	Other circRNA
chr8	124089350	124096580	WDR67	300	+	Ambiguous circRNA
chr15	43690235	43694048	TUBGCP4	299	+	Ambiguous circRNA
chr2	203155045	203160560	NOP58	302	+	Other circRNA
chr10	86177526	86185649	FAM190B	309	+	Ambiguous circRNA
chr19	37203287	37203769	ZNF567	303	+	Ambiguous circRNA
chr5	139819703	139825560	ANKHD1|ANKHD1-EIF4EBP3	303	+	Other circRNA
chr12	19615443	19626289	AEBP2	303	+	Ambiguous circRNA
chr3	125032151	125050082	ZNF148	304	-	AUG circRNA
chr5	145634505	145638156	RBM27	304	+	Other circRNA
chr10	3160973	3162236	PFKP	299	+	Other circRNA
chr1	12638745	12639440	DHRS3	293	-	Other circRNA
chr17	45740454	45745776	KPNB1	300	+	Other circRNA
chr6	43023282	43024183	MRPL2	294	-	Other circRNA
chr17	40652724	40653322	ATP6V0A1	295	+	Other circRNA
chr5	61745753	61747760	IPO11	297	+	Other circRNA
chr19	58772216	58775042	ZNF544	292	+	Ambiguous circRNA
chr13	78293666	78327493	SLAIN1	299	+	Ambiguous circRNA
chr4	87685745	87689129	PTPN13	293	+	Other circRNA
chr15	69728476	69729061	KIF23	292	+	Other circRNA
chr17	38562635	38563194	TOP2A	293	-	Other circRNA
chr19	39439206	39440976	FBXO17	287	-	Ambiguous circRNA
chrX	130877123	130928494	LOC286467	294	-	Other circRNA
chr14	75513078	75516421	MLH3	291	-	Ambiguous circRNA
chr6	101246588	101253756	ASCC3	291	-	Other circRNA
chr15	85657103	85664245	PDE8A	287	+	Other circRNA
chr8	71071739	71075089	NCOA2	286	-	Other circRNA
chr3	127980970	127983624	EEFSEC	292	+	Other circRNA
chr1	155408117	155408859	ASH1L	290	-	Other circRNA
chr1	21295966	21307720	EIF4G3	288	-	Other circRNA
chr15	90137645	90138842	C15orf42	281	+	Other circRNA
chr20	21321358	21327188	XRN2	279	+	Other circRNA
chr19	6230580	6270770	MLLT1	286	-	Other circRNA
chr6	76412360	76412788	SENP6	286	+	Other circRNA
chr15	73052747	73067438	ADPGK	288	-	Ambiguous circRNA
chr20	34309661	34313077	RBM39	279	-	Ambiguous circRNA
chr1	101372407	101387397	SLC30A7	285	+	Other circRNA
chr9	134312006	134314448	PRRC2B	283	+	Other circRNA
chr9	6880011	6893232	KDM4C	283	+	Ambiguous circRNA
chr16	354303	364683	AXIN1	281	-	Other circRNA
chr5	109049220	109051965	MAN2A1	280	+	Other circRNA
chr8	15508205	15531345	TUSC3	279	+	Other circRNA
chr6	170852688	170858201	PSMB1	281	-	Ambiguous circRNA
chr12	1136913	1137738	ERC1	280	+	Ambiguous circRNA
chr1	173961892	173962273	RC3H1	271	-	AUG circRNA
chr6	139264649	139265759	REPS1	278	-	Other circRNA
chr15	101775286	101775782	CHSY1	281	-	Other circRNA
chr13	61013821	61041513	TDRD3	280	+	Ambiguous circRNA
chr1	47761436	47767420	STIL	277	-	Other circRNA
chr1	92798947	92846430	RPAP2	280	+	Ambiguous circRNA
chr1	6291961	6293703	ICMT	271	-	Ambiguous circRNA
chr1	70758070	70781249	ANKRD13C	278	-	Other circRNA
chr1	224918163	224922408	CNIH3	278	+	Other circRNA
chr7	157013382	157024021	UBE3C	266	+	Other circRNA
chr9	134305476	134308181	PRRC2B	272	+	AUG circRNA
chr10	126628942	126631876	ZRANB1	270	+	AUG circRNA
chr1	44773981	44785416	ERI3	273	-	Ambiguous circRNA
chr12	28458581	28544344	CCDC91	270	+	Ambiguous circRNA
chr10	34558584	34573173	PARD3	272	-	Other circRNA
chr8	25265498	25266456	DOCK5	267	+	Ambiguous circRNA
chr6	20546576	20548936	CDKAL1	269	+	AUG circRNA
chr10	126370175	126370948	FAM53B	270	-	Other circRNA
chr8	141874410	141900868	PTK2	268	-	Ambiguous circRNA
chr6	42941740	42942776	PEX6	265	-	Ambiguous circRNA
chr15	64791491	64792365	ZNF609	269	+	AUG circRNA
chr11	78176921	78204241	NARS2	264	-	Other circRNA
chr15	66828270	66839043	ZWILCH	260	+	Other circRNA
chr2	36668400	36669878	CRIM1	262	+	Other circRNA
chr17	42231923	42232779	C17orf53	260	+	Ambiguous circRNA
chr13	21305979	21306260	N6AMT2	260	-	Ambiguous circRNA
chr1	29362337	29365938	EPB41	257	+	Other circRNA
chr3	194169185	194175121	ATP13A3	252	-	Other circRNA
chr7	102106263	102106717	LRWD1	259	+	Other circRNA
chr5	145197456	145205763	PRELID2	262	-	AUG circRNA
chr2	191765289	191789319	GLS	252	+	Other circRNA
chr6	83728691	83754378	UBE2CBP	255	-	Ambiguous circRNA
chr18	9182379	9221997	ANKRD12	257	+	AUG circRNA
chr16	31102095	31102663	PRSS53	260	-	Other circRNA
chr1	40319641	40323089	TRIT1	252	-	Other circRNA
chr19	38631823	38633350	SIPA1L3	253	+	Other circRNA
chr1	223991875	223994649	TP53BP2	253	-	Ambiguous circRNA
chr16	22236974	22237296	EEF2K	251	+	Ambiguous circRNA
chr17	80721840	80739597	TBCD	255	+	Other circRNA
chr1	45223227	45223812	KIF2C	259	+	Other circRNA
chr19	12825634	12826553	TNPO2	251	-	Other circRNA
chr22	32874967	32875262	FBXO7	254	+	Ambiguous circRNA
chr4	113483526	113511030	C4orf21	247	-	Other circRNA
chr20	2944917	2945848	PTPRA	251	+	Ambiguous circRNA
chr19	41884185	41884424	TMEM91|BCKDHA	249	+	AUG circRNA
chr1	35846859	35855699	ZMYM4	246	+	Other circRNA
chr17	60111147	60112969	MED13	246	-	Other circRNA
chr17	47388673	47389404	ZNF652	247	-	Ambiguous circRNA
chr4	1902352	1906105	WHSC1	249	+	Ambiguous circRNA
chr1	52289335	52299842	NRD1	251	-	Ambiguous circRNA
chr2	215632205	215646233	BARD1	250	-	Ambiguous circRNA
chr17	5364258	5365866	DHX33	245	-	Ambiguous circRNA
chr1	165859440	165860559	UCK2	250	+	Ambiguous circRNA
chr1	225140371	225156576	DNAH14	250	+	AUG circRNA
chr2	100078957	100081447	REV1	251	-	AUG circRNA
chr19	19603114	19603521	GATAD2A	239	+	Other circRNA
chr2	72692288	72707879	EXOC6B	241	-	Other circRNA
chr9	103261046	103279053	C9orf30-TMEFF1|TMEFF1	243	+	Other circRNA
chr2	30748452	30756180	LCLAT1	245	+	Ambiguous circRNA
chr3	52771601	52775515	NEK4	241	-	Other circRNA
chr10	27458872	27462188	MASTL	239	+	Other circRNA
chr18	13681603	13682104	FAM210A	243	-	AUG circRNA
chr12	46633461	46637097	SLC38A1	243	-	AUG circRNA
chr17	44248220	44249598	KIAA1267	244	-	AUG circRNA
chr2	200245086	200298237	SATB2	244	-	Other circRNA
chr6	10894099	10898348	SYCP2L	235	+	Other circRNA
chr14	23502576	23502883	PSMB5	241	-	Ambiguous circRNA
chr7	23650789	23651172	CCDC126	241	+	AUG circRNA
chr7	80418621	80440017	SEMA3C	242	-	Other circRNA
chr6	170846321	170858201	PSMB1	243	-	Ambiguous circRNA
chr1	21377358	21415706	EIF4G3	241	-	Other circRNA
chr1	41578954	41608784	SCMH1	241	-	Ambiguous circRNA
chr12	42604156	42604482	YAF2	241	-	Other circRNA
chr12	118533337	118533619	VSIG10	234	-	Other circRNA
chr15	89790859	89804074	FANCI	236	+	Ambiguous circRNA
chr6	47501337	47522502	CD2AP	237	+	Other circRNA
chr2	45773870	45789895	SRBD1	238	-	Ambiguous circRNA
chr12	120995084	120995485	RNF10	235	+	Ambiguous circRNA
chr17	74483793	74484214	RHBDF2	232	-	Other circRNA
chr1	85331067	85331821	LPAR3	240	-	AUG circRNA
chr16	53907697	53922863	FTO	238	+	Other circRNA
chr22	46780439	46785396	CELSR1	236	-	Other circRNA
chr8	48308935	48320523	KIAA0146	233	+	Ambiguous circRNA
chr5	134076752	134079742	CAMLG	234	+	Other circRNA
chr12	112513481	112516545	NAA25	233	-	Ambiguous circRNA
chr19	31038849	31040421	ZNF536	236	+	Other circRNA
chr16	47531309	47549512	PHKB	232	+	Other circRNA
chr19	34921480	34925873	UBA2	229	+	Ambiguous circRNA
chr2	48701821	48718309	PPP1R21	230	+	Other circRNA
chr5	56542126	56545403	GPBP1	227	+	Ambiguous circRNA
chr21	16386664	16415895	NRIP1	230	-	Other circRNA
chr20	32207322	32211102	CBFA2T2	229	+	Ambiguous circRNA
chr17	59999085	60002460	INTS2	226	-	Other circRNA
chr2	170401230	170413807	FASTKD1	225	-	Ambiguous circRNA
chr1	233225806	233231609	PCNXL2	232	-	Ambiguous circRNA
chr11	120916382	120930794	TBCEL	226	+	Ambiguous circRNA
chr2	136360069	136362586	R3HDM1	233	+	AUG circRNA
chr6	79770194	79770535	PHIP	232	-	Other circRNA
chr2	29129325	29137074	WDR43	230	+	Other circRNA
chr5	179136873	179147561	CANX	228	+	Other circRNA
chr13	41826780	41835051	MTRF1	222	-	Ambiguous circRNA
chr1	35846859	35854683	ZMYM4	226	+	Other circRNA
chr1	213037066	213058738	FLVCR1	225	+	Other circRNA
chr1	21076215	21100103	HP1BP3	223	-	Other circRNA
chr15	91524113	91525211	PRC1	222	-	Other circRNA
chr3	138289159	138290198	CEP70	225	-	Other circRNA
chr10	111883774	111890244	ADD3	222	+	Other circRNA
chr11	33572585	33573787	C11orf41	220	+	Other circRNA
chr9	128419929	128434922	MAPKAP1	227	-	Ambiguous circRNA
chr1	93677657	93682303	CCDC18	223	+	Other circRNA
chr17	67270083	67280213	ABCA5	224	-	Ambiguous circRNA
chrX	14868626	14877456	FANCB	223	-	Other circRNA
chr9	138824902	138825361	UBAC1	218	-	Other circRNA
chr22	46085591	46136418	ATXN10	225	+	Ambiguous circRNA
chr17	25630392	25636298	WSB1	219	+	Ambiguous circRNA
chr11	129979323	129980556	APLP2	225	+	Other circRNA
chr7	24659670	24708279	MPP6	222	+	AUG circRNA
chr18	12999419	13030607	CEP192	220	+	AUG circRNA
chr5	145176004	145205763	PRELID2	222	-	AUG circRNA
chr5	38991050	39003724	RICTOR	224	-	Ambiguous circRNA
chr5	167915606	167924353	RARS	217	+	Ambiguous circRNA
chr5	41927114	41930019	FBXO4	216	+	Other circRNA
chr1	94360169	94367225	GCLM	215	-	Other circRNA
chr1	155490890	155491409	ASH1L	220	-	AUG circRNA
chr5	109049220	109065214	MAN2A1	219	+	Other circRNA
chr12	122825299	122826244	CLIP1	217	-	Other circRNA
chr12	69644908	69656342	CPSF6	214	+	Other circRNA
chr2	43655238	43657441	THADA	221	-	Other circRNA
chr1	219366423	219414650	LYPLAL1	215	+	Other circRNA
chr18	33606862	33613800	RPRD1A	219	-	Other circRNA
chr3	196118683	196129890	UBXN7	216	-	Ambiguous circRNA
chr6	158994451	159010814	TMEM181	217	+	Ambiguous circRNA
chr17	54926056	54934026	DGKE	213	+	Other circRNA
chr10	93756125	93768032	BTAF1	209	+	Other circRNA
chr14	23378691	23380612	RBM23	215	-	AUG circRNA
chr18	60206913	60217693	ZCCHC2	214	+	Ambiguous circRNA
chr6	161455290	161471011	MAP3K4	215	+	Ambiguous circRNA
chr5	179665331	179668155	MAPK9	210	-	Other circRNA
chr6	89554075	89563483	RNGTT	213	-	Other circRNA
chr12	51402258	51404549	SLC11A2	206	-	Ambiguous circRNA
chr7	99090662	99092254	ZNF394	213	-	Ambiguous circRNA
chr5	179132679	179137066	CANX	213	+	Ambiguous circRNA
chr16	69729038	69729282	NFAT5	211	+	Other circRNA
chr21	47801608	47805898	PCNT	208	+	Other circRNA
chr16	18846213	18856973	SMG1	204	-	Other circRNA
chr18	697239	706578	ENOSF1	209	-	Ambiguous circRNA
chr7	155457868	155473602	RBM33	211	+	Other circRNA
chr5	37301538	37303516	NUP155	206	-	Other circRNA
chr6	167435896	167447459	FGFR1OP|CCR6	210	+	Ambiguous circRNA
chr2	61710091	61717911	XPO1	204	-	Other circRNA
chr6	3410421	3416089	SLC22A23	211	-	Ambiguous circRNA
chr1	234586173	234608557	TARBP1	208	-	Other circRNA
chr10	93754291	93768032	BTAF1	201	+	Other circRNA
chr7	148529725	148544397	EZH2	204	-	Ambiguous circRNA
chr1	207989273	207990759	mir-29b-2	207	-	Other circRNA
chr12	69210591	69218431	MDM2	204	+	Ambiguous circRNA
chr2	61719169	61724142	XPO1	197	-	Ambiguous circRNA
chr3	155611306	155629068	GMPS	203	+	Other circRNA
chr1	12359258	12368698	VPS13D	202	+	Other circRNA
chr7	716865	751164	PRKAR1B	202	-	AUG circRNA
chr15	99250790	99251336	IGF1R	209	+	Other circRNA
chr7	22347957	22357656	RAPGEF5	204	-	AUG circRNA
chr5	132426884	132428481	HSPA4	204	+	Other circRNA
chr1	185143503	185144245	SWT1	197	+	Other circRNA
chr9	86293355	86301070	UBQLN1	203	-	Other circRNA
chr10	117221450	117228839	ATRNL1	201	+	Other circRNA
chr5	8330015	8334839	LOC729506	200	-	Other circRNA
chr18	9931806	9937063	VAPA	201	+	Other circRNA
chr1	8601272	8674745	RERE	194	-	Other circRNA
chr3	170906490	170912424	TNIK	202	-	Other circRNA
chr16	48381417	48382201	LONP2	199	+	Other circRNA
chr9	88211276	88248289	AGTPBP1	200	-	Other circRNA
chr1	67356836	67371058	WDR78	203	-	Other circRNA
chr9	115336336	115337531	KIAA1958	203	+	AUG circRNA
chr15	76566752	76588078	ETFA	200	-	Other circRNA
chr14	23419522	23421892	HAUS4	195	-	Ambiguous circRNA
chr20	25000645	25004277	ACSS1	194	-	Other circRNA
chr17	3988963	3989949	ZZEF1	197	-	Other circRNA
chr14	91947919	91952074	SMEK1	199	-	Ambiguous circRNA
chr12	77214837	77216311	ZDHHC17	195	+	Other circRNA
chr17	19861326	19861884	AKAP10	196	-	Other circRNA
chr3	196817782	196846401	DLG1	199	-	Ambiguous circRNA
chr17	27613009	27614734	NUFIP2	194	-	Other circRNA
chr2	201721404	201721708	CLK1	197	-	Other circRNA
chr6	7176887	7189555	RREB1	195	+	AUG circRNA
chr22	42204878	42209826	CCDC134	200	+	AUG circRNA
chr1	16237595	16242774	SPEN	199	+	Other circRNA
chr6	17665469	17669777	NUP153	195	-	Other circRNA
chr6	111583459	111585149	KIAA1919	192	+	Other circRNA
chr1	150997086	150998149	PRUNE	191	+	Ambiguous circRNA
chr19	8520288	8528570	HNRNPM	194	+	Other circRNA
chr18	196636	204692	USP14	194	+	Other circRNA
chr8	131370262	131374017	ASAP1	198	-	AUG circRNA
chr14	96807858	96813678	ATG2B	196	-	Other circRNA
chr17	74308950	74309972	PRPSAP1	192	-	Other circRNA
chr22	36914809	36915584	EIF3D	193	-	Other circRNA
chr3	3178943	3186394	TRNT1	187	+	Ambiguous circRNA
chr2	45773870	45780869	SRBD1	192	-	Ambiguous circRNA
chr16	1675973	1682366	CRAMP1L	193	+	Other circRNA
chr1	24840803	24841057	RCAN3	191	+	AUG circRNA
chr1	160293220	160302347	COPA	191	-	Other circRNA
chr16	74493579	74497377	GLG1	190	-	Other circRNA
chr9	111868787	111870850	C9orf5	192	-	Ambiguous circRNA
chr7	27668989	27689252	HIBADH	196	-	Other circRNA
chr9	86297865	86301070	UBQLN1	194	-	Other circRNA
chr4	149356255	149358014	NR3C2	192	-	Ambiguous circRNA
chr3	56703727	56707753	FAM208A	190	-	Other circRNA
chr4	128842678	128861152	MFSD8	194	-	Other circRNA
chr7	27668989	27672064	HIBADH	194	-	Other circRNA
chr5	139819703	139828890	ANKHD1|ANKHD1-EIF4EBP3	188	+	Other circRNA
chr9	136302868	136303486	ADAMTS13	184	+	Ambiguous circRNA
chr16	80718434	80719026	CDYL2	191	-	Other circRNA
chr16	56419830	56423287	AMFR	191	-	Other circRNA
chr13	21305979	21311944	N6AMT2	183	-	Other circRNA
chr7	131071878	131084192	MKLN1	192	+	Ambiguous circRNA
chr7	140402665	140404763	NDUFB2	186	+	Ambiguous circRNA
chr3	51575513	51624575	RAD54L2	190	+	Ambiguous circRNA
chr17	28808160	28811788	GOSR1	185	+	Ambiguous circRNA
chr3	145838898	145842016	PLOD2	188	-	Ambiguous circRNA
chr12	117423010	117426674	FBXW8	191	+	Other circRNA
chr1	94341823	94343418	DNTTIP2	186	-	Ambiguous circRNA
chr2	61709514	61717911	XPO1	186	-	Other circRNA
chr7	129760588	129762042	KLHDC10	186	+	Other circRNA
chr12	70149163	70150443	RAB3IP	186	+	Ambiguous circRNA
chr10	103552595	103570071	MGEA5	183	-	Other circRNA
chr6	158703294	158735300	TULP4	185	+	AUG circRNA
chr8	27151596	27151827	TRIM35	186	-	Ambiguous circRNA
chr16	68308593	68309152	SLC7A6	184	+	Ambiguous circRNA
chr2	61721028	61724142	XPO1	185	-	Other circRNA
chr9	4823547	4827033	RCL1	183	+	Other circRNA
chr10	112723882	112745523	SHOC2	190	+	AUG circRNA
chr14	71492833	71502874	PCNX	182	+	Ambiguous circRNA
chr2	223084858	223097002	PAX3	182	-	Other circRNA
chr19	5047486	5082515	KDM4B	183	+	Other circRNA
chr17	62248459	62265775	TEX2	181	-	Other circRNA
chr3	107429298	107435696	BBX	183	+	Ambiguous circRNA
chr21	32554737	32575328	TIAM1	183	-	Other circRNA
chr17	40650941	40653322	ATP6V0A1	179	+	Other circRNA
chr12	111990083	111993723	ATXN2	183	-	Ambiguous circRNA
chr1	21097422	21100103	HP1BP3	182	-	Other circRNA
chr1	211952259	211966532	LPGAT1	181	-	Other circRNA
chr18	12999419	13042333	CEP192	183	+	AUG circRNA
chr19	47767859	47768203	CCDC9	179	+	Other circRNA
chr6	82923943	82924546	IBTK	175	-	Other circRNA
chr16	85667519	85667738	KIAA0182	182	+	Other circRNA
chr4	37633006	37640126	RELL1	180	-	Other circRNA
chr11	8435041	8486369	STK33	175	-	Ambiguous circRNA
chr12	40422102	40442012	SLC2A13	180	-	Other circRNA
chr17	73238416	73239651	GGA3	178	-	Ambiguous circRNA
chr15	94841429	94841959	MCTP2	179	+	Ambiguous circRNA
chr2	32735592	32738221	BIRC6	174	+	Other circRNA
chr20	47570092	47580435	ARFGEF2	176	+	Other circRNA
chr20	62407030	62422143	ZBTB46	181	-	Ambiguous circRNA
chr14	104245081	104263855	PPP1R13B	178	-	Ambiguous circRNA
chr1	48821341	48825442	SPATA6	181	-	Other circRNA
chr16	28112778	28113266	XPO6	176	-	Other circRNA
chr10	13214375	13214765	MCM10	177	+	Other circRNA
chr10	102683731	102685776	FAM178A	174	+	Other circRNA
chr19	3623685	3624160	C19orf29	176	-	Ambiguous circRNA
chr8	26439484	26441499	DPYSL2	178	+	Ambiguous circRNA
chr5	73136304	73136585	RGNEF	173	+	Other circRNA
chr8	74585341	74601048	STAU2	175	-	Other circRNA
chr18	74561481	74583781	ZNF236	173	+	Ambiguous circRNA
chr7	56049902	56051561	GBAS	174	+	Other circRNA
chr1	146724277	146731572	CHD1L	179	+	Ambiguous circRNA
chr1	31478699	31479949	PUM1	176	-	Other circRNA
chr6	99912479	99916494	USP45	174	-	Other circRNA
chr14	102506572	102509085	DYNC1H1	171	+	Other circRNA
chr1	44773981	44804994	ERI3	177	-	Ambiguous circRNA
chr5	6737622	6746540	PAPD7	175	+	AUG circRNA
chr1	219366423	219392054	LYPLAL1	177	+	Other circRNA
chr1	42730785	42744343	FOXJ3	177	-	Other circRNA
chr9	134381500	134381840	POMT1	171	+	Ambiguous circRNA
chr10	93608139	93611093	TNKS2	171	+	Other circRNA
chr12	125436943	125438757	DHX37	174	-	Other circRNA
chr10	27453992	27454468	MASTL	169	+	Ambiguous circRNA
chr2	32698179	32702651	BIRC6	168	+	Other circRNA
chr2	29006772	29011675	PPP1CB|SPDYA	168	+	Ambiguous circRNA
chr13	21742126	21742538	SKA3	172	-	Other circRNA
chr10	94291504	94297307	IDE	173	-	Other circRNA
chr6	111493897	111498868	SLC16A10	173	+	Other circRNA
chr12	11273608	11276786	PRH1-PRR4|PRB4	172	-	Other circRNA
chr2	135010665	135012215	MGAT5	174	+	AUG circRNA
chr1	151611363	151611595	SNX27	175	+	Other circRNA
chr14	73711351	73712883	PAPLN	163	+	Ambiguous circRNA
chr14	91409421	91413894	RPS6KA5	169	-	Ambiguous circRNA
chr1	224553580	224559125	CNIH4	168	+	Other circRNA
chr16	89164998	89169167	ACSF3	169	+	AUG circRNA
chr10	96201652	96234540	TBC1D12	170	+	Other circRNA
chr10	17746429	17747740	STAM	170	+	Other circRNA
chr5	43292575	43297268	HMGCS1	165	-	Other circRNA
chr5	77805606	77806221	LHFPL2	170	-	AUG circRNA
chr5	153413350	153414527	FAM114A2	169	-	Ambiguous circRNA
chr6	83667030	83754378	UBE2CBP	168	-	Ambiguous circRNA
chr20	35207143	35207369	TGIF2|TGIF2-C20ORF24	166	+	AUG circRNA
chr10	70723046	70726959	DDX21	168	+	Other circRNA
chr1	89236034	89237562	PKN2	166	+	Other circRNA
chr8	141889569	141900868	PTK2	169	-	Ambiguous circRNA
chr22	41670603	41677086	RANGAP1	166	-	AUG circRNA
chr12	1372199	1399178	ERC1	166	+	Ambiguous circRNA
chr1	233482187	233498039	KIAA1804	163	+	Other circRNA
chr10	31661946	31676195	ZEB1	165	+	Ambiguous circRNA
chr2	61749745	61753656	XPO1	168	-	Ambiguous circRNA
chr19	23541231	23545527	BC038574	170	-	Other circRNA
chr2	43805651	43818093	THADA	165	-	Ambiguous circRNA
chr5	80063751	80088663	MSH3	168	+	Other circRNA
chr15	72300166	72320134	MYO9A	165	-	Ambiguous circRNA
chr8	117668094	117671219	EIF3H	165	-	Other circRNA
chr2	70406663	70409129	C2orf42	167	-	AUG circRNA
chr10	12123470	12133683	DHTKD1	172	+	Other circRNA
chr7	17908029	17915413	SNX13	165	-	Ambiguous circRNA
chr7	116339124	116340338	MET	168	+	AUG circRNA
chr1	213037066	213046160	FLVCR1	166	+	Other circRNA
chr5	56160560	56161804	MAP3K1	167	+	Other circRNA
chr10	126395204	126395456	FAM53B	166	-	AUG circRNA
chr17	67270099	67280213	ABCA5	165	-	Ambiguous circRNA
chr1	6007163	6012896	NPHP4	168	-	Ambiguous circRNA
chr1	21599191	21616649	ECE1	165	-	Other circRNA
chr4	119252870	119259469	PRSS12	161	-	Other circRNA
chr19	13064953	13065340	GADD45GIP1	162	-	Other circRNA
chr6	160467529	160469575	IGF2R	168	+	Other circRNA
chr1	213251037	213290752	RPS6KC1	163	+	Ambiguous circRNA
chr12	129299319	129299615	SLC15A4	162	-	Ambiguous circRNA
chr2	136432901	136437894	R3HDM1	162	+	Other circRNA
chr9	88190229	88248289	AGTPBP1	161	-	Other circRNA
chr22	25771779	25771975	LRP5L	161	-	Other circRNA
chr10	94396940	94405399	KIF11	159	+	Other circRNA
chr16	88008653	88017865	BANP	164	+	AUG circRNA
chr2	10281980	10282502	C2orf48	162	+	AUG circRNA
chr20	35695126	35696589	RBL1	159	-	Ambiguous circRNA
chr5	137278563	137278905	FAM13B	158	-	Other circRNA
chr7	158552176	158557544	ESYT2	162	-	Other circRNA
chr16	23632682	23634451	PALB2	160	-	Other circRNA
chr10	49609654	49618211	MAPK8	158	+	AUG circRNA
chr16	68300495	68309152	SLC7A6	157	+	Ambiguous circRNA
chr3	57276883	57282379	APPL1	156	+	Other circRNA
chr12	459786	463400	KDM5A	158	-	Other circRNA
chr8	29959413	29962002	LEPROTL1	158	+	Other circRNA
chr3	155551256	155560408	SLC33A1	162	-	Other circRNA
chr12	936207	939326	WNK1	159	+	Other circRNA
chr9	14639893	14680160	ZDHHC21	157	-	AUG circRNA
chr12	107236366	107237725	RIC8B	160	+	Ambiguous circRNA
chr20	57242545	57246353	STX16	155	+	Ambiguous circRNA
chr1	150902442	150913904	SETDB1	159	+	Other circRNA
chr15	90431752	90432372	AP3S2|C15orf38-AP3S2	157	-	Ambiguous circRNA
chr1	12061457	12062160	MFN2	157	+	Other circRNA
chr7	69364271	69364484	AUTS2	162	+	Other circRNA
chr2	227729319	227779067	RHBDD1	160	+	AUG circRNA
chr15	30053341	30065560	TJP1	159	-	Other circRNA
chr9	33948371	33948585	UBAP2	156	-	Other circRNA
chr18	9583114	9595151	PPP4R1	159	-	Other circRNA
chr16	70566381	70578436	SF3B3	153	+	Other circRNA
chr7	3658711	3681737	SDK1	158	+	Other circRNA
chr1	150464886	150470223	TARS2	153	+	Ambiguous circRNA
chr5	93964515	93966448	ANKRD32	153	+	Other circRNA
chr19	36940300	36940903	ZNF566	154	-	Ambiguous circRNA
chr14	37754522	37777724	MIPOL1	157	+	Ambiguous circRNA
chr2	24046127	24046439	ATAD2B	152	-	Ambiguous circRNA
chr15	89656955	89659752	ABHD2	157	+	AUG circRNA
chr20	62654109	62657411	PRPF6	151	+	Other circRNA
chr19	33604672	33605325	GPATCH1	154	+	Other circRNA
chr17	29483000	29497015	NF1	154	+	Other circRNA
chr9	77631183	77632364	C9orf41	154	-	Ambiguous circRNA
chr11	77090285	77091039	PAK1	152	-	Ambiguous circRNA
chr1	14057494	14068652	PRDM2	156	+	Other circRNA
chr5	14316621	14336836	TRIO	152	+	Ambiguous circRNA
chr22	26853824	26854543	HPS4	154	-	Other circRNA
chr5	16779653	16783578	MYO10	153	-	Other circRNA
chr14	50616725	50616948	SOS2	149	-	Ambiguous circRNA
chr6	137015277	137018525	MAP3K5	151	-	Other circRNA
chr6	82920530	82922510	IBTK	148	-	Other circRNA
chr10	87614252	87615947	GRID1	153	-	Ambiguous circRNA
chr15	100692816	100739628	ADAMTS17	154	-	Other circRNA
chr10	79613111	79614128	DLG5	149	-	Ambiguous circRNA
chr7	129679303	129688984	ZC3HC1	150	-	Other circRNA
chr19	34942885	34955036	UBA2	148	+	Ambiguous circRNA
chr17	7849045	7849304	CNTROB	152	+	Other circRNA
chr14	23375403	23380612	RBM23	151	-	Ambiguous circRNA
chr12	116668237	116675510	MED13L	153	-	Other circRNA
chr1	244582061	244583598	ADSS	147	-	Other circRNA
chr17	35604934	35609962	ACACA	152	-	Other circRNA
chr1	109884635	109888503	SORT1	151	-	Other circRNA
chr5	132227855	132228810	AFF4	152	-	Other circRNA
chr12	90049455	90049884	ATP2B1	149	-	AUG circRNA
chr3	47719687	47727660	SMARCC1	149	-	Other circRNA
chr12	110922882	110925748	C12orf24	148	+	Other circRNA
chr14	23395341	23396023	PRMT5	150	-	Other circRNA
chr5	41794104	41807540	OXCT1	151	-	Other circRNA
chr5	137342678	137356886	FAM13B	149	-	AUG circRNA
chr6	149953894	149959696	KATNA1	148	-	AUG circRNA
chr10	103432671	103436193	FBXW4	150	-	Other circRNA
chr15	65471271	65472542	CLPX	150	-	Ambiguous circRNA
chr10	96347985	96354611	HELLS	147	+	Ambiguous circRNA
chr7	97820039	97823884	LMTK2	147	+	Other circRNA
chr3	18456602	18462483	SATB1	149	-	AUG circRNA
chr10	70547683	70548085	CCAR1	149	+	Ambiguous circRNA
chr4	151023629	151023964	DCLK2	148	+	Ambiguous circRNA
chr4	2956150	2958538	NOP14	147	-	Ambiguous circRNA
chr17	37864573	37866734	ERBB2	146	+	Ambiguous circRNA
chr2	48049356	48050499	FBXO11	147	-	Ambiguous circRNA
chr7	100454489	100454798	SLC12A9	145	+	Ambiguous circRNA
chr16	4382215	4383520	GLIS2	148	+	AUG circRNA
chr1	225600155	225607500	LBR	146	-	Other circRNA
chr1	35879572	35881315	ZMYM4	145	+	Other circRNA
chr10	120488806	120489922	C10orf46	151	-	Ambiguous circRNA
chr22	41738532	41739580	ZC3H7B	147	+	Other circRNA
chr17	34864900	34867294	MYO19	148	-	Ambiguous circRNA
chr17	35310185	35311207	AATF	144	+	Other circRNA
chr6	137015277	137041727	MAP3K5	147	-	Ambiguous circRNA
chr3	183368083	183369064	KLHL24	145	+	AUG circRNA
chr15	76584771	76588078	ETFA	145	-	Other circRNA
chr2	30775358	30791042	LCLAT1	145	+	AUG circRNA
chr9	6420911	6434173	UHRF2	141	+	Ambiguous circRNA
chr6	116966876	116982009	ZUFSP	147	-	Other circRNA
chr4	174169130	174169591	GALNT7	146	+	Other circRNA
chr20	45891031	45905539	ZMYND8	144	-	Ambiguous circRNA
chr5	176636636	176639196	NSD1	142	+	Other circRNA
chr6	117013217	117047785	KPNA5	144	+	Other circRNA
chr6	159001971	159010814	TMEM181	145	+	Other circRNA
chr22	41277773	41278181	XPNPEP3	142	+	Ambiguous circRNA
chr6	144808683	144814592	UTRN	143	+	Other circRNA
chr16	70497071	70497677	FUK	145	+	AUG circRNA
chr2	242265407	242275513	2002-09-01	142	+	Other circRNA
chr1	232649602	232651354	SIPA1L2	145	-	AUG circRNA
chr10	120832401	120833449	EIF3A	143	-	Ambiguous circRNA
chr4	73956383	73958017	ANKRD17	140	-	Other circRNA
chr22	46096161	46136418	ATXN10	145	+	Ambiguous circRNA
chr1	155408117	155429689	ASH1L	149	-	Other circRNA
chr19	29111630	29139338	BC068609	141	-	Other circRNA
chr2	64778576	64780543	AFTPH	145	+	AUG circRNA
chr5	179976930	179980471	CNOT6	145	+	Other circRNA
chr1	19519926	19523759	UBR4	144	-	Other circRNA
chr14	55168779	55169298	SAMD4A	147	+	Ambiguous circRNA
chr9	4860124	4860901	RCL1	141	+	Other circRNA
chr1	44386075	44386600	ST3GAL3	145	+	Ambiguous circRNA
chr12	32760890	32764217	FGD4	143	+	Ambiguous circRNA
chr9	86294689	86301070	UBQLN1	138	-	Other circRNA
chr3	47716964	47719801	SMARCC1	142	-	Ambiguous circRNA
chr1	93676358	93682303	CCDC18	139	+	Other circRNA
chr13	42385360	42393522	KIAA0564	142	-	Other circRNA
chr2	8910799	8917022	KIDINS220	135	-	Other circRNA
chr16	89962397	89967202	TCF25	138	+	Other circRNA
chr6	167435896	167438382	FGFR1OP|CCR6	140	+	Ambiguous circRNA
chr1	89236034	89251896	PKN2	143	+	Other circRNA
chr11	11348632	11362551	GALNTL4	144	-	Other circRNA
chr6	57058639	57075243	RAB23	143	-	Ambiguous circRNA
chr7	100417178	100417918	EPHB4	142	-	Other circRNA
chr5	176370335	176378578	UIMC1	140	-	Other circRNA
chr21	34906884	34911662	GART	140	-	Ambiguous circRNA
chr7	44684925	44687358	OGDH	142	+	Ambiguous circRNA
chr14	23395341	23396869	PRMT5	141	-	Ambiguous circRNA
chr6	105280916	105291173	HACE1	138	-	Ambiguous circRNA
chrX	40518478	40518859	MED14	136	-	Other circRNA
chr19	58290118	58291514	ZNF586	133	+	Other circRNA
chr12	49890615	49893988	SPATS2	136	+	Ambiguous circRNA
chr6	101214440	101253756	ASCC3	141	-	Other circRNA
chr2	191765289	191769893	GLS	139	+	Other circRNA
chr20	35812582	35812776	RPN2	140	+	Ambiguous circRNA
chr1	52943379	52947595	ZCCHC11	138	-	Other circRNA
chr14	35252967	35262127	BAZ1A	138	-	Other circRNA
chr7	102768929	102769239	NAPEPLD	139	-	Ambiguous circRNA
chr18	60015400	60017170	TNFRSF11A	138	+	Other circRNA
chr10	96005702	96006378	PLCE1	135	+	Other circRNA
chr12	95602618	95605043	FGD6	138	-	Other circRNA
chr5	72354259	72373320	FCHO2	134	+	Ambiguous circRNA
chr20	42331129	42333998	MYBL2	135	+	Other circRNA
chr17	59820373	59857762	BRIP1	134	-	Ambiguous circRNA
chr2	242079935	242082489	PASK	138	-	AUG circRNA
chr3	101389973	101391057	ZBTB11	134	-	Other circRNA
chr1	21091869	21100103	HP1BP3	136	-	Other circRNA
chr2	227771508	227779067	RHBDD1	135	+	Other circRNA
chr11	72695132	72700142	FCHSD2	137	-	Ambiguous circRNA
chr2	61721028	61722748	XPO1	136	-	Other circRNA
chr1	169446392	169446995	SLC19A2	134	-	Other circRNA
chr19	34685382	34687668	LSM14A	134	+	Other circRNA
chr11	108046972	108047817	NPAT	134	-	Other circRNA
chr10	105197771	105198565	PDCD11	137	+	Other circRNA
chr16	70292882	70296427	AARS	135	-	Other circRNA
chr4	77977114	77987558	CCNI	131	-	AUG circRNA
chr1	227149077	227153438	ADCK3	134	+	AUG circRNA
chr4	42003632	42051496	SLC30A9	132	+	Ambiguous circRNA
chr9	88200377	88248289	AGTPBP1	134	-	Other circRNA
chr10	98303832	98336586	TM9SF3	137	-	Other circRNA
chr5	139818045	139825560	ANKHD1|ANKHD1-EIF4EBP3	132	+	Other circRNA
chr7	131060182	131084192	MKLN1	133	+	Ambiguous circRNA
chr3	78987750	78988077	ROBO1	135	-	Other circRNA
chr11	70200406	70202360	PPFIA1	133	+	Ambiguous circRNA
chr13	100953713	100962162	PCCA	133	+	Other circRNA
chr8	104417003	104420012	SLC25A32	132	-	Other circRNA
chr4	140058783	140060651	ELF2	133	-	AUG circRNA
chrX	14861781	14877456	FANCB	132	-	Other circRNA
chr15	72338064	72338975	MYO9A	133	-	AUG circRNA
chr1	215749243	215752480	KCTD3	133	+	Ambiguous circRNA
chr16	74666420	74670475	RFWD3	133	-	Other circRNA
chr3	11399891	11468400	ATG7	134	+	Other circRNA
chr7	40037092	40041630	CDK13	133	+	Other circRNA
chr1	230798886	230810870	COG2	132	+	Ambiguous circRNA
chr2	212483901	212495319	ERBB4	133	-	Other circRNA
chr6	136990420	137019820	MAP3K5	132	-	Other circRNA
chr19	36746178	36746488		131	+	Other circRNA
chr21	32537278	32575328	TIAM1	133	-	Other circRNA
chr3	179481789	179483636	USP13	130	+	Other circRNA
chr6	111665127	111678328	REV3L	128	-	Ambiguous circRNA
chr14	75567694	75570700	NEK9	131	-	Other circRNA
chr16	47497809	47549512	PHKB	130	+	AUG circRNA
chr20	61488746	61490878	TCFL5	132	-	Other circRNA
chr10	46158989	46159290	ZFAND4	130	-	Ambiguous circRNA
chr7	810107	814799	HEATR2	133	+	Ambiguous circRNA
chr1	21377358	21437876	EIF4G3	132	-	Other circRNA
chr8	124089350	124117704	WDR67	131	+	Ambiguous circRNA
chr5	156786012	156788606	CYFIP2	130	+	Other circRNA
chr19	47858295	47858607	DHX34	130	+	Other circRNA
chr20	21346058	21349228	XRN2	130	+	Other circRNA
chr5	38991050	39021238	RICTOR	131	-	Ambiguous circRNA
chr22	32134372	32134897	PRR14L	129	-	AUG circRNA
chr10	115636279	115644139	NHLRC2	130	+	Other circRNA
chr17	1690103	1690898	SMYD4	128	-	Other circRNA
chr12	1345934	1428454	ERC1	134	+	Ambiguous circRNA
chr10	5827814	5842668	GDI2	130	-	Other circRNA
chr3	93722502	93722752	ARL13B	130	+	Ambiguous circRNA
chr18	21644103	21663045	TTC39C	129	+	Ambiguous circRNA
chr13	96485180	96489456	UGGT2	133	-	Other circRNA
chr5	65284462	65290692	ERBB2IP	132	+	AUG circRNA
chr2	48725631	48738607	PPP1R21	127	+	Other circRNA
chr21	40619626	40630598	BRWD1	129	-	Ambiguous circRNA
chr11	85707868	85742653	PICALM	129	-	Ambiguous circRNA
chr5	61846193	61857084	IPO11	131	+	Ambiguous circRNA
chrX	107083899	107097934	MID2	127	+	Other circRNA
chr8	103850971	103855975	AZIN1	128	-	AUG circRNA
chr1	65278420	65280523	RAVER2	126	+	Other circRNA
chr20	42331129	42331543	MYBL2	124	+	Other circRNA
chr4	76711302	76711950	USO1	125	+	Other circRNA
chr6	163876310	163899928	QKI	130	+	Other circRNA
chr17	48818462	48819092	LUC7L3	128	+	Ambiguous circRNA
chr5	36953719	36976504	NIPBL	126	+	AUG circRNA
chr16	4861170	4862249	GLYR1	125	-	Ambiguous circRNA
chr4	38091552	38104778	TBC1D1	130	+	Other circRNA
chr16	74694829	74695349	RFWD3	126	-	AUG circRNA
chr13	52971366	52972329	THSD1	125	-	Other circRNA
chr1	151288048	151288985	PI4KB	128	-	Ambiguous circRNA
chr15	91310139	91312816	BLM	123	+	Other circRNA
chr12	112321384	112321572	MAPKAPK5	125	+	Other circRNA
chr19	40747844	40748594	AKT2	128	-	Other circRNA
chr14	73614502	73614802	PSEN1	131	+	AUG circRNA
chr10	5751492	5756170	C10orf18	124	+	Other circRNA
chr2	24205765	24207701	UBXN2A	125	+	Ambiguous circRNA
chr5	170319390	170351554	RANBP17	129	+	Ambiguous circRNA
chr4	87693930	87696805	PTPN13	127	+	Other circRNA
chr3	150280328	150281401	EIF2A	126	+	Ambiguous circRNA
chr6	43106586	43107263	PTK7	124	+	Ambiguous circRNA
chr5	133534776	133541822	PPP2CA	130	-	Other circRNA
chr2	109405307	109411177	CCDC138	125	+	Ambiguous circRNA
chr5	137288316	137290065	FAM13B	127	-	Other circRNA
chr2	64083439	64085070	UGP2	128	+	Ambiguous circRNA
chr10	70246900	70253327	SLC25A16	125	-	Other circRNA
chr6	43514307	43516197	XPO5	125	-	Other circRNA
chr10	116879948	116931050	ATRNL1	125	+	Other circRNA
chr2	128520635	128528578	WDR33	124	-	AUG circRNA
chr2	53941520	53943880	ASB3|GPR75-ASB3	122	-	Other circRNA
chr21	40600425	40601362	BRWD1	128	-	Ambiguous circRNA
chr16	11114049	11154879	CLEC16A	125	+	Other circRNA
chr2	202625603	202626541	ALS2	124	-	Other circRNA
chr17	47118739	47119739	IGF2BP1	126	+	Other circRNA
chr2	36623756	36669878	CRIM1	127	+	Other circRNA
chr12	22637630	22659753	KIAA0528	125	-	Other circRNA
chr10	99196947	99197507	EXOSC1	122	-	Ambiguous circRNA
chr5	37331786	37341344	NUP155	123	-	Other circRNA
chr14	102468873	102469302	DYNC1H1	122	+	Other circRNA
chr21	42598192	42629253	BACE2	125	+	Other circRNA
chr1	52293467	52299842	NRD1	125	-	Ambiguous circRNA
chr15	100692816	100695525	ADAMTS17	126	-	Other circRNA
chr1	28907071	28907741	SNHG12	125	-	Other circRNA
chr4	83793096	83796975	SEC31A	121	-	Other circRNA
chr1	179972308	179975702	CEP350	123	+	Other circRNA
chr6	151336015	151336829	MTHFD1L	122	+	Ambiguous circRNA
chr21	27423315	27425664	APP	125	-	Other circRNA
chr8	22332466	22333137	PPP3CC	126	+	Other circRNA
chr17	30320883	30321740	SUZ12	123	+	Other circRNA
chr4	151656409	151729550	LRBA	126	-	Other circRNA
chr13	20625572	20641530	ZMYM2	122	+	Other circRNA
chr10	76602357	76603236	KAT6B	122	+	AUG circRNA
chr11	18312988	18314523	HPS5	124	-	Other circRNA
chr1	42730785	42744455	FOXJ3	121	-	Other circRNA
chr7	105103067	105108910	PUS7	122	-	Other circRNA
chr1	51253671	51267349	FAF1	122	-	Ambiguous circRNA
chr4	1919867	1920350	WHSC1	121	+	Ambiguous circRNA
chr9	33948371	33953472	UBAP2	120	-	Other circRNA
chr12	133310970	133313651	ANKLE2	120	-	Other circRNA
chr16	72122885	72124685	TXNL4B	121	-	Ambiguous circRNA
chr1	21327691	21329301	EIF4G3	124	-	AUG circRNA
chr7	91924202	91957214	ANKIB1	124	+	AUG circRNA
chr2	197777605	197786910	PGAP1	121	-	AUG circRNA
chr1	66378927	66384518	PDE4B	124	+	AUG circRNA
chr1	31810021	31811895	ZCCHC17	119	+	Other circRNA
chr5	170305100	170323119	RANBP17	122	+	Ambiguous circRNA
chr19	2438160	2438529	LMNB2	120	-	Other circRNA
chr1	78267015	78280916	FAM73A	118	+	Other circRNA
chr12	42768664	42792796	PPHLN1	124	+	Ambiguous circRNA
chr4	6925099	6925838	TBC1D14	122	+	AUG circRNA
chr15	49528047	49584734	GALK2	120	+	Ambiguous circRNA
chr1	150202905	150204264	ANP32E	120	-	Ambiguous circRNA
chr1	225742607	225755116	ENAH	121	-	Ambiguous circRNA
chr17	58700881	58711338	PPM1D	121	+	Ambiguous circRNA
chr12	112641439	112642427	C12orf51	121	-	Other circRNA
chr7	2269618	2270362	MAD1L1	120	-	AUG circRNA
chr6	144858717	144860579	UTRN	120	+	Other circRNA
chr1	183083665	183084772	LAMC1	121	+	Other circRNA
chr9	140611077	140611634	EHMT1	118	+	Ambiguous circRNA
chr2	109455640	109473426	CCDC138	120	+	Other circRNA
chr5	74041502	74046492	GFM2	123	-	Ambiguous circRNA
chr1	24495906	24507344	IL28RA	120	-	Other circRNA
chr10	76153898	76158337	ADK	117	+	Other circRNA
chr3	15452751	15457449	METTL6	115	-	Other circRNA
chr8	18725183	18730243	PSD3	118	-	Other circRNA
chr18	74153200	74155167	ZNF516	120	-	AUG circRNA
chr1	165859440	165865569	UCK2	117	+	Other circRNA
chr7	72873865	72884813	BAZ1B	122	-	Other circRNA
chr2	148730307	148739650	ORC4	120	-	AUG circRNA
chr9	114296018	114296633	ZNF483	115	+	Other circRNA
chr14	31596990	31602881	HECTD1	118	-	Other circRNA
chr22	29120964	29121355	CHEK2	119	-	Ambiguous circRNA
chr16	583945	586142	SOLH	114	+	Ambiguous circRNA
chr3	93714717	93722752	ARL13B	118	+	Ambiguous circRNA
chr1	114267380	114269196	PHTF1	115	-	Other circRNA
chrX	77270158	77275895	ATP7A	117	+	Other circRNA
chr2	227729319	227732034	RHBDD1	118	+	AUG circRNA
chr9	33351557	33352717	NFX1	118	+	Other circRNA
chr2	9083315	9098771	MBOAT2	120	-	Other circRNA
chr17	54921379	54923170	DGKE	115	+	Other circRNA
chr8	99718694	99735197	STK3	119	-	Other circRNA
chr3	61608136	61609229	PTPRG	119	+	Other circRNA
chr11	103173821	103194718	DYNC2H1	116	+	Other circRNA
chr1	41651792	41660071	SCMH1	116	-	Ambiguous circRNA
chr22	29025539	29025818	TTC28	116	-	Other circRNA
chr1	26772806	26774151	DHDDS	119	+	Other circRNA
chr8	124346117	124348772	ATAD2	115	-	Ambiguous circRNA
chr4	108603170	108615162	PAPSS1	118	-	Ambiguous circRNA
chr5	142434003	142437312	ARHGAP26	118	+	Other circRNA
chr6	64404470	64410356	PHF3	115	+	Other circRNA
chr5	130857082	130883883	RAPGEF6	117	-	Ambiguous circRNA
chr19	41782063	41787180	HNRNPUL1	116	+	Other circRNA
chr15	58306055	58306479	ALDH1A2	113	-	Other circRNA
chr17	5365638	5367009	DHX33	114	-	Other circRNA
chr21	34906884	34907626	GART	117	-	Ambiguous circRNA
chrX	71681853	71684581	HDAC8	118	-	Ambiguous circRNA
chr12	123052807	123061576	KNTC1	115	+	Other circRNA
chr1	38052911	38054683	GNL2	114	-	Ambiguous circRNA
chr7	77407654	77408131	RSBN1L	114	+	Other circRNA
chr16	66764014	66766408	DYNC1LI2	110	-	Other circRNA
chr3	155611306	155624052	GMPS	114	+	Other circRNA
chr2	37516498	37518142	PRKD3	113	-	Other circRNA
chr18	51804072	51813781	POLI	114	+	Other circRNA
chr10	12123470	12136270	DHTKD1	115	+	Other circRNA
chr1	35569895	35576048	ZMYM1	111	+	Ambiguous circRNA
chr15	43242459	43258484	UBR1	115	-	Other circRNA
chr17	4186092	4200109	UBE2G1	112	-	Other circRNA
chr1	33058531	33059355	ZBTB8B|ZBTB8A	113	+	Ambiguous circRNA
chr20	47683726	47689234	CSE1L	113	+	Other circRNA
chr2	190656515	190682906	PMS1	117	+	Ambiguous circRNA
chr6	3284085	3287325	SLC22A23	112	-	Ambiguous circRNA
chr8	38282026	38283763	FGFR1	115	-	Ambiguous circRNA
chr8	124089350	124121860	WDR67	116	+	Ambiguous circRNA
chr8	48845579	48846650	PRKDC	113	-	Other circRNA
chr15	64592517	64592922	CSNK1G1	112	-	Ambiguous circRNA
chr7	139415730	139416814	HIPK2	113	-	Other circRNA
chr14	104219336	104220581	PPP1R13B	111	-	Other circRNA
chr2	62227835	62228117	COMMD1	114	+	Other circRNA
chr20	31376659	31380576	DNMT3B	111	+	Ambiguous circRNA
chr10	93185037	93221941	HECTD2	113	+	Ambiguous circRNA
chr12	83250788	83251359	TMTC2	114	+	Other circRNA
chr22	38083916	38084999	NOL12|TRIOBP	113	+	Ambiguous circRNA
chr9	138741982	138742307	CAMSAP1	112	-	Ambiguous circRNA
chr5	56526672	56527148	GPBP1	111	+	Ambiguous circRNA
chr11	85733409	85742653	PICALM	114	-	Ambiguous circRNA
chr21	47734629	47735461	C21orf58	113	-	Ambiguous circRNA
chr3	49884957	49885633	TRAIP	110	-	Other circRNA
chr10	86130769	86133571	FAM190B	117	+	AUG circRNA
chr16	11114049	11118778	CLEC16A	112	+	Other circRNA
chr12	1887019	1893239	ADIPOR2	111	+	Other circRNA
chr16	23113639	23119504	USP31	114	-	Other circRNA
chr15	65799580	65804902	DPP8	110	-	Ambiguous circRNA
chr1	32653554	32655850	TXLNA	113	+	Other circRNA
chr3	47476497	47484581	SCAP	114	-	Ambiguous circRNA
chr10	909682	931700	LARP4B	114	-	AUG circRNA
chr14	64065473	64066691	WDR89	110	-	AUG circRNA
chr5	66055536	66084622	MAST4	111	+	Other circRNA
chr1	220179447	220180680	EPRS	112	-	Other circRNA
chr5	60768507	60790237	ZSWIM6	113	+	Other circRNA
chr14	102486229	102489217	DYNC1H1	111	+	Other circRNA
chr22	22160138	22162135	MAPK1	112	-	Other circRNA
chr5	140960310	140963182	DIAPH1	110	-	Other circRNA
chr17	27975161	27977818	SSH2	113	-	Other circRNA
chr2	136620176	136622733	MCM6	109	-	Other circRNA
chr7	45688268	45701813	ADCY1	111	+	Other circRNA
chr16	67719359	67719705	GFOD2	107	-	AUG circRNA
chr11	94532555	94533477	AMOTL1	111	+	Other circRNA
chr15	74948073	74948409	EDC3	109	-	Other circRNA
chr2	62100136	62103369	CCT4	107	-	Other circRNA
chr17	35640167	35646430	ACACA	107	-	AUG circRNA
chr1	43239233	43241150	C1orf50	107	+	Other circRNA
chr15	50592985	50593565	GABPB1	112	-	Other circRNA
chr9	96233422	96259881	FAM120A	107	+	Other circRNA
chr12	19626181	19653155	AEBP2	108	+	Other circRNA
chr14	103336521	103342862	TRAF3	110	+	AUG circRNA
chr22	42204878	42206004	CCDC134	108	+	AUG circRNA
chr7	35707043	35712888	HERPUD2	110	-	Other circRNA
chr1	118454615	118461358	GDAP2	108	-	Other circRNA
chr1	21220009	21221994	EIF4G3	111	-	Other circRNA
chr1	145592632	145595220	POLR3C	106	-	Other circRNA
chr1	8555122	8617582	RERE	109	-	Other circRNA
chr11	107965117	107966418	CUL5	107	+	Ambiguous circRNA
chr12	459786	461490	KDM5A	107	-	Other circRNA
chr18	46858233	46860223	DYM	109	-	Ambiguous circRNA
chr9	134330462	134334743	PRRC2B	110	+	Ambiguous circRNA
chr11	117023156	117034608	PAFAH1B2	110	+	Ambiguous circRNA
chr12	27149674	27152609	TM7SF3	106	-	Other circRNA
chr11	107260799	107263621	CWF19L2	109	-	Ambiguous circRNA
chr17	11998891	12016677	MAP2K4	110	+	Other circRNA
chr15	65790201	65793117	DPP8	107	-	Ambiguous circRNA
chr19	36507713	36510286	BC071809	107	+	AUG circRNA
chr18	9583114	9595100	PPP4R1	106	-	Ambiguous circRNA
chrX	133607388	133627620	HPRT1	107	+	Other circRNA
chr16	70560489	70564820	SF3B3	106	+	AUG circRNA
chr2	26596234	26598016	EPT1	106	+	Ambiguous circRNA
chr4	140046317	140060651	ELF2	108	-	AUG circRNA
chr12	12672795	12674397	DUSP16	110	-	AUG circRNA
chr10	1130342	1151207	WDR37	109	+	Ambiguous circRNA
chr17	1339913	1340449	CRK	104	-	Other circRNA
chr20	39721111	39729993	TOP1	109	+	Other circRNA
chr10	79761954	79767624	POLR3A	107	-	Other circRNA
chr12	110820647	110834257	ANAPC7	108	-	Other circRNA
chr19	38621137	38621412	SIPA1L3	105	+	Other circRNA
chr3	9792628	9793633	OGG1	105	+	Other circRNA
chr6	135360710	135363264	HBS1L	109	-	Other circRNA
chr5	140961878	140963182	DIAPH1	105	-	Other circRNA
chr1	152221370	152224234		107	+	Other circRNA
chr10	74322652	74326552	MICU1	104	-	AUG circRNA
chr8	17868745	17869336	PCM1	100	+	Other circRNA
chr3	53908237	53910107	ACTR8	104	-	Other circRNA
chr6	52132662	52134024	MCM3	107	-	Other circRNA
chr17	57128574	57134415	TRIM37	105	-	Other circRNA
chr1	29313942	29314417	EPB41	103	+	Ambiguous circRNA
chr17	56780556	56787351	RAD51C	105	+	Ambiguous circRNA
chr8	120800577	120810086	TAF2	105	-	Other circRNA
chr11	12785725	12785981	TEAD1	108	+	AUG circRNA
chr8	141856358	141900868	PTK2	105	-	Ambiguous circRNA
chr3	124456414	124463050	UMPS	102	+	Ambiguous circRNA
chr10	32197099	32199491	ARHGAP12	104	-	AUG circRNA
chr1	65243305	65255197	RAVER2	109	+	Other circRNA
chr17	25630392	25631937	WSB1	104	+	Ambiguous circRNA
chr8	48196616	48206619	KIAA0146	106	+	Ambiguous circRNA
chr15	75219106	75221573	COX5A	110	-	Other circRNA
chr2	32639836	32641231	BIRC6	104	+	Other circRNA
chr16	27224905	27226329	JMJD5	104	+	Other circRNA
chr1	151150476	151156969	VPS72	103	-	Other circRNA
chr10	12039670	12056183	UPF2	104	-	Other circRNA
chr8	48320422	48353104	KIAA0146	105	+	Ambiguous circRNA
chr1	229622117	229623360	NUP133	103	-	Other circRNA
chr2	128922303	128928858	UGGT1	103	+	Other circRNA
chr6	5404774	5431405	FARS2	106	+	Other circRNA
chr17	46189392	46190763	SNX11	103	+	AUG circRNA
chr12	56824664	56826308	TIMELESS	106	-	Other circRNA
chr1	22816372	22818026	ZBTB40	103	+	AUG circRNA
chr12	51449617	51450285	LETMD1	103	+	Ambiguous circRNA
chr19	34818325	34821252	KIAA0355	103	+	Other circRNA
chr3	186509513	186510736	RFC4	105	-	Other circRNA
chr17	20149238	20163607	SPECC1	103	+	Other circRNA
chr3	196812450	196846401	DLG1	103	-	Other circRNA
chr17	27248705	27251320	PHF12	102	-	Other circRNA
chr6	31116181	31116505	CCHCR1	97	-	Other circRNA
chr15	43692241	43694048	TUBGCP4	102	+	Ambiguous circRNA
chr4	73984404	73991029	ANKRD17	103	-	Other circRNA
chr11	128993340	129034322	ARHGAP32	104	-	Ambiguous circRNA
chr3	47139444	47147610	SETD2	107	-	Other circRNA
chr17	61841375	61842207	CCDC47	102	-	Other circRNA
chr20	47707278	47711500	CSE1L	103	+	Other circRNA
chr2	242343242	242357524	FARP2	103	+	Other circRNA
chr13	24823614	24826000	SPATA13	103	+	Ambiguous circRNA
chr5	139574030	139574237	C5orf32	104	+	AUG circRNA
chr4	140263979	140265493	NAA15	99	+	Other circRNA
chr17	58711213	58725443	PPM1D	102	+	Ambiguous circRNA
chr19	37916769	37917280	ZNF569	101	-	Other circRNA
chr1	31532050	31532424	PUM1	101	-	Ambiguous circRNA
chr7	44714009	44714867	OGDH	100	+	Other circRNA
chr8	71126137	71128999	NCOA2	104	-	AUG circRNA
chr2	61505299	61508377	USP34	100	-	Other circRNA
chr10	86177526	86198463	FAM190B	101	+	Other circRNA
chr1	15964801	15970145	DDI2	102	+	Other circRNA
chr1	10327437	10328321	KIF1B	102	+	Ambiguous circRNA
chr10	93711159	93713630	BTAF1	101	+	Ambiguous circRNA
chr20	5939173	5944005	MCM8	99	+	Other circRNA
chr17	73808192	73809959	UNK	101	+	Other circRNA
chr1	171492359	171496983	PRRC2C	101	+	Other circRNA
chr9	33996220	34017187	UBAP2	99	-	AUG circRNA
chr10	12160747	12162266	DHTKD1	98	+	Other circRNA
chr19	5653125	5653431	SAFB	102	+	Other circRNA
chr16	48311248	48337216	LONP2	104	+	Ambiguous circRNA
chr1	53352627	53358647	ZYG11A	99	+	Other circRNA
chr3	52771601	52773650	NEK4	100	-	Other circRNA
chr3	61975298	61989171	PTPRG	102	+	Other circRNA
chr22	28692185	28702631	TTC28	102	-	Other circRNA
chr1	46105881	46108171	GPBP1L1	102	-	Other circRNA
chr14	62188226	62188541	HIF1A	95	+	Ambiguous circRNA
chr1	89206670	89251896	PKN2	102	+	Other circRNA
chr3	17051165	17056403	PLCL2	101	+	Ambiguous circRNA
chr16	69189773	69201088	CIRH1A	99	+	Other circRNA
chr19	34868407	34868786	GPI	101	+	Other circRNA
chr7	98513345	98515302	TRRAP	99	+	Other circRNA
chr10	35805450	35819171	CCNY	100	+	Other circRNA
chr17	65162593	65163912	HELZ	100	-	Ambiguous circRNA
chr8	48508372	48511758	KIAA0146	103	+	Ambiguous circRNA
chr4	110451444	110452678	SEC24B	98	+	Other circRNA
chr10	123298105	123325218	FGFR2	98	-	Other circRNA
chr10	94653105	94669388	EXOC6	100	+	Other circRNA
chr8	48882357	48884028	MCM4	99	+	Other circRNA
chr12	22811947	22826594	ETNK1	101	+	Other circRNA
chr6	82935193	82941559	IBTK	99	-	Ambiguous circRNA
chr1	44877652	44878394	RNF220	98	+	AUG circRNA
chr1	114214355	114216087	MAGI3	100	+	Other circRNA
chr11	85722072	85742653	PICALM	99	-	Ambiguous circRNA
chr14	69583082	69589077	DCAF5	100	-	Other circRNA
chr4	103635594	103647840	MANBA	100	-	Other circRNA
chr1	101379218	101387397	SLC30A7	99	+	Other circRNA
chr10	1130342	1142186	WDR37	99	+	Ambiguous circRNA
chr9	124910390	124914687	NDUFA8	99	-	Other circRNA
chr4	154315413	154318485	MND1	100	+	Ambiguous circRNA
chr11	47774467	47776216	FNBP4	99	-	Other circRNA
chr8	145737774	145738154	RECQL4	101	-	Other circRNA
chr18	19345732	19399607	MIB1	101	+	Ambiguous circRNA
chr1	109884635	109888500	SORT1	96	-	Other circRNA
chr19	4430545	4432204	CHAF1A	101	+	Other circRNA
chr17	18768781	18769265	PRPSAP2	97	+	Ambiguous circRNA
chr3	179131199	179137293	GNB4	99	-	Other circRNA
chr6	158870027	158873300	TULP4	97	+	Other circRNA
chr1	144921834	144922638	PDE4DIP	96	-	Other circRNA
chr6	10935290	10956475	SYCP2L	96	+	Other circRNA
chr4	25848915	25849486	SEL1L3	95	-	Other circRNA
chr10	7262372	7327916	SFMBT2	97	-	Other circRNA
chr7	121753171	121773795	AASS	99	-	AUG circRNA
chr1	78177431	78181553	USP33	99	-	Other circRNA
chr16	70502751	70505255	FUK	99	+	Ambiguous circRNA
chr10	27431315	27434519	YME1L1	99	-	Other circRNA
chr14	81362061	81372425	CEP128	95	-	Other circRNA
chr4	79186178	79188586	FRAS1	96	+	Ambiguous circRNA
chr8	143425326	143427253	TSNARE1	100	-	Other circRNA
chr7	44465498	44467302	NUDCD3	99	-	Other circRNA
chr1	179304640	179310445	SOAT1	97	+	Ambiguous circRNA
chr5	77711343	77717784	SCAMP1	98	+	Ambiguous circRNA
chr12	22796696	22826594	ETNK1	96	+	Other circRNA
chr18	45391429	45423180	SMAD2	100	-	AUG circRNA
chr15	67523567	67529158	AAGAB	95	-	Ambiguous circRNA
chr2	20454623	20455931	PUM2	95	-	Other circRNA
chr11	8457040	8486369	STK33	98	-	Ambiguous circRNA
chr13	96622365	96648389	UGGT2	97	-	Other circRNA
chr14	75576387	75577074	NEK9	95	-	Ambiguous circRNA
chr9	74489529	74489999	FAM108B1	97	-	AUG circRNA
chr16	18839352	18845760	SMG1	96	-	Other circRNA
chr15	73064123	73067438	ADPGK	95	-	Ambiguous circRNA
chr14	100847246	100848083	WDR25	93	+	AUG circRNA
chr11	6953324	6977013	ZNF215	97	+	AUG circRNA
chr22	32874967	32881196	FBXO7	99	+	Ambiguous circRNA
chr2	44190726	44202356	LRPPRC	96	-	Other circRNA
chr12	27867712	27877119	MRPS35	100	+	Other circRNA
chr6	74190397	74191967	MTO1	95	+	Other circRNA
chr5	43122140	43139411	ZNF131	93	+	Ambiguous circRNA
chr13	95858785	95863035	ABCC4	96	-	Other circRNA
chr3	127778944	127779504	SEC61A1	95	+	Ambiguous circRNA
chr1	179089324	179091002	ABL2	96	-	Other circRNA
chr3	155611306	155615830	GMPS	97	+	Other circRNA
chr3	182788786	182789145	MCCC1	97	-	Ambiguous circRNA
chr10	105777917	105778666	SLK	96	+	Other circRNA
chr10	75296026	75299351	USP54	97	-	Ambiguous circRNA
chr11	76174864	76183884	C11orf30	96	+	Other circRNA
chr17	28011580	28030080	SSH2	99	-	Other circRNA
chr8	29927157	29927575	TMEM66	94	-	Ambiguous circRNA
chr1	11133990	11137005	EXOSC10	95	-	Other circRNA
chr1	180793888	180794480	XPR1	94	+	Other circRNA
chr4	17963525	17974508	LCORL	96	-	Ambiguous circRNA
chr5	39002636	39021238	RICTOR	98	-	Ambiguous circRNA
chr6	24416624	24418806	MRS2	95	+	Ambiguous circRNA
chr8	141828375	141900868	PTK2	93	-	Ambiguous circRNA
chr8	42183487	42186732	IKBKB	93	+	Ambiguous circRNA
chr17	3969740	3976050	ZZEF1	92	-	Other circRNA
chr7	148716083	148718239	PDIA4	93	-	Other circRNA
chr5	135483520	135489852	SMAD5	97	+	AUG circRNA
chr10	95790439	95792009	PLCE1	95	+	AUG circRNA
chr2	32703702	32704685	BIRC6	95	+	Other circRNA
chr7	98564663	98565321	TRRAP	94	+	Other circRNA
chr15	67528316	67529158	AAGAB	92	-	Ambiguous circRNA
chr1	51032748	51061888	FAF1	93	-	Other circRNA
chr17	19921299	20013875	SPECC1	98	+	AUG circRNA
chr2	58449076	58459247	FANCL	94	-	Other circRNA
chr20	45121320	45125591		94	-	Other circRNA
chr1	871151	874792	SAMD11	96	+	Ambiguous circRNA
chr1	95609446	95616975	TMEM56|TMEM56-RWDD3	94	+	AUG circRNA
chr5	179136873	179143295	CANX	91	+	Other circRNA
chr6	167435896	167453827	FGFR1OP|CCR6	91	+	Ambiguous circRNA
chr1	23397717	23398690	KDM1A	95	+	Other circRNA
chr9	127670655	127674305	GOLGA1	90	-	Ambiguous circRNA
chr13	96622365	96651561	UGGT2	94	-	Other circRNA
chr13	20576989	20580726	ZMYM2	92	+	Other circRNA
chr19	34922765	34925873	UBA2	94	+	Ambiguous circRNA
chr6	155095122	155116273	SCAF8	95	+	Other circRNA
chr12	109052513	109055934	CORO1C	90	-	Other circRNA
chr2	159992704	160007067	TANC1	92	+	Other circRNA
chr1	116202261	116206889	VANGL1	92	+	Other circRNA
chr12	111990083	111990781	ATXN2	94	-	Ambiguous circRNA
chr20	42315491	42328684	MYBL2	92	+	Other circRNA
chr20	50342357	50346517	ATP9A	91	-	Other circRNA
chr11	3712576	3716836	NUP98	92	-	Other circRNA
chr3	52960046	52962357	SFMBT1	91	-	Other circRNA
chr20	35835675	35838568	RPN2	91	+	Other circRNA
chr7	30590251	30601744	LOC401320	90	-	Other circRNA
chr13	33306237	33309467	PDS5B	92	+	Ambiguous circRNA
chr4	148867767	148887990	ARHGAP10	92	+	Other circRNA
chr7	101870646	101870949	CUX1	92	+	Other circRNA
chr1	213290658	213303232	RPS6KC1	92	+	Ambiguous circRNA
chr8	100286425	100287482	VPS13B	93	+	Other circRNA
chr15	93540186	93541851	CHD2	90	+	Other circRNA
chr16	74491771	74493687	GLG1	91	-	Other circRNA
chr8	70650274	70674110	SLCO5A1	93	-	Other circRNA
chr4	25334804	25335610	ZCCHC4	92	+	Other circRNA
chr3	183435438	183446639	YEATS2	88	+	Other circRNA
chr20	10536878	10541468	C20orf94	90	+	Other circRNA
chr9	135917473	135919313	GTF3C5	89	+	Other circRNA
chr1	205238077	205239012	TMCC2	91	+	Ambiguous circRNA
chr2	69590676	69601245	GFPT1	89	-	Other circRNA
chr4	20469374	20493522	SLIT2	90	+	Other circRNA
chr2	240929490	240946787	NDUFA10	93	-	Other circRNA
chr17	78022381	78024082	CCDC40	92	+	Other circRNA
chr16	69317950	69318147	SNTB2	91	+	Ambiguous circRNA
chr22	32121523	32134897	PRR14L	91	-	AUG circRNA
chr1	154223516	154224129	UBAP2L	90	+	Other circRNA
chr19	5039846	5041262	KDM4B	88	+	Other circRNA
chr2	69565029	69565697	GFPT1	89	-	Other circRNA
chr3	48215773	48219478	CDC25A	90	-	Other circRNA
chr6	107824860	107854814	SOBP	91	+	Other circRNA
chr6	105280916	105297121	HACE1	89	-	Ambiguous circRNA
chr15	43690238	43694048	TUBGCP4	88	+	Other circRNA
chr1	215759837	215768813	KCTD3	89	+	Ambiguous circRNA
chr16	71712657	71715808	PHLPP2	89	-	Ambiguous circRNA
chr2	197777605	197784874	PGAP1	88	-	Ambiguous circRNA
chr15	63988322	64008672	HERC1	90	-	Other circRNA
chr4	1902352	1941505	WHSC1	90	+	Ambiguous circRNA
chr2	209163364	209167077	PIKFYVE	89	+	Ambiguous circRNA
chr7	6472467	6476164	DAGLB	89	-	Other circRNA
chr6	170033042	170052104	WDR27	87	-	Ambiguous circRNA
chr7	6150755	6155154	USP42	89	+	Ambiguous circRNA
chr8	42812236	42819617	HOOK3	89	+	Other circRNA
chr2	72945231	72968598	EXOC6B	90	-	Other circRNA
chr5	179996109	179998432	CNOT6	88	+	Other circRNA
chr3	47702783	47719801	SMARCC1	90	-	Ambiguous circRNA
chr9	117399269	117401006	C9orf91	88	+	Other circRNA
chr5	102432244	102433485	GIN1	86	-	Other circRNA
chr1	47745912	47748131	STIL	88	-	Other circRNA
chr11	134054531	134055421	NCAPD3	88	-	Ambiguous circRNA
chr11	47857202	47859175	NUP160	87	-	Ambiguous circRNA
chr20	50290691	50292747	ATP9A	88	-	Other circRNA
chr16	396147	397106	AXIN1	90	-	AUG circRNA
chr8	28013458	28019595	ELP3	88	+	Other circRNA
chr22	30032739	30035201	NF2	86	+	Ambiguous circRNA
chr19	14568842	14569187	PKN1	86	+	Other circRNA
chr3	155282703	155282907	PLCH1	85	-	Other circRNA
chr20	18523662	18535034	SEC23B	85	+	Other circRNA
chr16	47531309	47581459	PHKB	88	+	Ambiguous circRNA
chr22	46782298	46785396	CELSR1	85	-	Other circRNA
chr10	70190192	70190417	DNA2	87	-	Other circRNA
chr19	4354945	4355170	MPND	86	+	Ambiguous circRNA
chr7	50737418	50742355	GRB10	85	-	Ambiguous circRNA
chr19	5039846	5047680	KDM4B	86	+	Other circRNA
chr1	35569895	35570370	ZMYM1	83	+	Ambiguous circRNA
chr8	135612678	135622898	ZFAT	86	-	Ambiguous circRNA
chr10	70196767	70229920	DNA2	86	-	Ambiguous circRNA
chr14	89192884	89221015	EML5	88	-	Other circRNA
chr2	15629017	15651474	NBAS	89	-	Ambiguous circRNA
chr15	85657103	85658718	PDE8A	85	+	Other circRNA
chr12	1480998	1553916	ERC1	86	+	Ambiguous circRNA
chr9	135172273	135187243	SETX	86	-	Other circRNA
chr9	90313570	90315152	DAPK1	86	+	Other circRNA
chr11	77394754	77404656	RSF1	86	-	Other circRNA
chr15	65959786	65962526	DENND4A	86	-	Other circRNA
chr1	205585605	205593019	ELK4	86	-	Other circRNA
chr9	78682870	78722267	PCSK5	86	+	Ambiguous circRNA
chr2	61258553	61259248	PEX13	88	+	Other circRNA
chr19	14513408	14515374	CD97	87	+	Other circRNA
chr1	229596357	229599423	NUP133	84	-	Other circRNA
chr15	69715497	69718796	KIF23	85	+	Ambiguous circRNA
chr9	140458885	140459606	WDR85	86	-	Ambiguous circRNA
chr12	96717725	96728643	CDK17	85	-	AUG circRNA
chr17	5250084	5253924	RABEP1	87	+	Other circRNA
chr17	45741524	45748198	KPNB1	85	+	Other circRNA
chr1	200583445	200584737	KIF14	86	-	Other circRNA
chr7	129825031	129832663	TMEM209	84	-	Other circRNA
chr2	61719169	61722748	XPO1	86	-	Ambiguous circRNA
chr6	149944238	149959696	KATNA1	88	-	AUG circRNA
chr15	52876941	52885933	FAM214A	85	-	Ambiguous circRNA
chr15	69713985	69714774	KIF23	85	+	Ambiguous circRNA
chr13	30801548	30815223	KATNAL1	88	-	Other circRNA
chr10	12123470	12126750	DHTKD1	84	+	Other circRNA
chr1	227327276	227335260	CDC42BPA	85	-	Other circRNA
chr11	61096834	61097546	DDB1	83	-	Other circRNA
chr11	118656760	118657227	DDX6	87	-	AUG circRNA
chr2	109388156	109389502	RANBP2	84	+	Other circRNA
chr22	28559079	28559587	TTC28	86	-	Other circRNA
chr20	31954664	31958435	CDK5RAP1	85	-	Other circRNA
chr22	30032739	30038274	NF2	84	+	Ambiguous circRNA
chr3	16336362	16345099	OXNAD1	87	+	Other circRNA
chr12	69109406	69119576	NUP107	84	+	Other circRNA
chr3	155637021	155643155	GMPS	86	+	Other circRNA
chr1	234553829	234563512	TARBP1	81	-	Other circRNA
chr12	123983090	123984083	RILPL1	86	-	Other circRNA
chr1	236969443	236979843	MTR	86	+	Ambiguous circRNA
chr9	95018961	95048121	IARS	84	-	Other circRNA
chr12	459786	465703	KDM5A	85	-	Other circRNA
chr5	139884405	139885454	ANKHD1|ANKHD1-EIF4EBP3	85	+	Other circRNA
chr2	170411633	170413807	FASTKD1	82	-	Ambiguous circRNA
chr6	90380637	90383181	MDN1	82	-	Other circRNA
chr16	71779046	71779517	AP1G1	82	-	Ambiguous circRNA
chr17	65850055	65850878	BPTF	83	+	Other circRNA
chr4	140037802	140060651	ELF2	85	-	AUG circRNA
chr8	131164981	131193126	ASAP1	85	-	Ambiguous circRNA
chr11	47444124	47444524	PSMC3	84	-	Other circRNA
chr4	140263979	140270735	NAA15	83	+	Other circRNA
chr6	101214440	101215221	ASCC3	84	-	Other circRNA
chr14	89041036	89044484	ZC3H14	84	+	Other circRNA
chr9	78682870	78711018	PCSK5	83	+	Ambiguous circRNA
chr21	47699906	47700489	MCM3AP	84	-	Other circRNA
chr10	121338237	121347760	TIAL1	82	-	Ambiguous circRNA
chr14	31371741	31380368	STRN3	82	-	Ambiguous circRNA
chr16	1859238	1859834	HAGH	83	-	Other circRNA
chr1	9800715	9801314	CLSTN1	82	-	Other circRNA
chr19	18648410	18649243	FKBP8	85	-	Other circRNA
chr11	32948702	32956981	QSER1	85	+	AUG circRNA
chr21	32617803	32624505	TIAM1	84	-	Ambiguous circRNA
chr3	15070092	15071959	NR2C2	81	+	Other circRNA
chr5	54570441	54577343	DHX29	80	-	Ambiguous circRNA
chr12	53670403	53671011	ESPL1	85	+	Other circRNA
chr12	42745686	42792796	PPHLN1	84	+	Other circRNA
chr21	38792600	38845182	DYRK1A	86	+	Ambiguous circRNA
chr1	230798886	230807386	COG2	84	+	Ambiguous circRNA
chr10	412214	430086	DIP2C	82	-	Other circRNA
chr5	138614015	138614818	SNHG4|MATR3	83	+	Ambiguous circRNA
chr2	209150449	209153542	PIKFYVE	83	+	Ambiguous circRNA
chr10	89638682	89693008	PTEN	84	+	Ambiguous circRNA
chr1	243800912	243859018	AKT3	82	-	Other circRNA
chr2	32602655	32620661	BIRC6	81	+	Other circRNA
chr12	14576842	14578407	ATF7IP	84	+	AUG circRNA
chr20	47682728	47683047	CSE1L	81	+	Other circRNA
chr19	49136700	49136912	DBP	81	-	Other circRNA
chr8	17601112	17613470	MTUS1	83	-	Ambiguous circRNA
chr5	92889466	92899169	FLJ42709	82	-	Other circRNA
chr2	172325397	172325966	DCAF17	82	+	Ambiguous circRNA
chr14	51107467	51111732	SAV1	82	-	Other circRNA
chr2	172782046	172844276	HAT1	81	+	Ambiguous circRNA
chr21	40578033	40601362	BRWD1	82	-	Ambiguous circRNA
chr9	125932180	125936121	STRBP	80	-	Other circRNA
chr10	3200231	3202522	PITRM1	82	-	Other circRNA
chr6	16586010	16658132	ATXN1	81	-	Ambiguous circRNA
chr10	28872327	28884970	WAC	82	+	Other circRNA
chr9	88257741	88261333	AGTPBP1	77	-	Other circRNA
chr9	134518625	134526336	RAPGEF1	84	-	Other circRNA
chr11	108098321	108106561	ATM	81	+	AUG circRNA
chr17	4109615	4113242	ANKFY1	83	-	Other circRNA
chrX	53672262	53707139	HUWE1	80	-	AUG circRNA
chr7	104678572	104681470	MLL5	82	+	Ambiguous circRNA
chr2	174223439	174224219	CDCA7	78	+	Other circRNA
chr8	9437668	9437893	TNKS	82	+	Ambiguous circRNA
chr15	78885433	78893729	CHRNA5	80	+	Other circRNA
chr5	128861976	128864370	ADAMTS19	79	+	Ambiguous circRNA
chr5	139818045	139828890	ANKHD1|ANKHD1-EIF4EBP3	81	+	Other circRNA
chr17	44143902	44172067	KIAA1267	82	-	Other circRNA
chr5	14741935	14758707	ANKH	81	-	Other circRNA
chrX	134679347	134690225	DDX26B	81	+	Other circRNA
chrX	79962925	79975155	BRWD3	80	-	Ambiguous circRNA
chr9	88190229	88194011	AGTPBP1	81	-	Other circRNA
chr5	83356118	83362425	EDIL3	81	-	Ambiguous circRNA
chr14	99723807	99724173	BCL11B	82	-	Other circRNA
chr1	12335881	12338095	VPS13D	80	+	Other circRNA
chr7	24663284	24720139	MPP6	81	+	AUG circRNA
chr3	156411808	156413814	TIPARP	80	+	Other circRNA
chr1	32495898	32498935	KHDRBS1	77	+	Ambiguous circRNA
chr9	138741982	138758382	CAMSAP1	79	-	Ambiguous circRNA
chr1	5987708	5993389	NPHP4	80	-	Ambiguous circRNA
chr1	180366650	180382606	ACBD6	80	-	Other circRNA
chr6	170626457	170632347	FAM120B	80	+	AUG circRNA
chr5	14330886	14336836	TRIO	79	+	Ambiguous circRNA
chr5	126140467	126147590	LMNB1	79	+	Ambiguous circRNA
chr7	24659670	24720139	MPP6	80	+	AUG circRNA
chr1	5987708	6012896	NPHP4	81	-	Ambiguous circRNA
chr6	82933784	82941559	IBTK	80	-	Ambiguous circRNA
chr1	243708811	243736350	AKT3	80	-	Other circRNA
chr2	44187679	44202356	LRPPRC	79	-	Other circRNA
chr1	243776972	243859018	AKT3	80	-	Other circRNA
chr6	10702601	10702872	PAK1IP1	78	+	Other circRNA
chr1	225600155	225603034	LBR	78	-	Other circRNA
chr19	41242890	41243674	ITPKC	79	+	Other circRNA
chr19	50902104	50902741	POLD1	78	+	AUG circRNA
chr17	71231614	71233134	C17orf80	77	+	AUG circRNA
chr20	30904020	30904677	KIF3B	77	+	Other circRNA
chr5	122881110	122911657	CSNK1G3	81	+	AUG circRNA
chr7	65705311	65751696	TPST1	79	+	AUG circRNA
chr1	78183551	78191447	USP33	77	-	Other circRNA
chr13	26911703	26928017	CDK8	78	+	Ambiguous circRNA
chr1	155896466	155896947	KIAA0907	78	-	Ambiguous circRNA
chr7	65751497	65751696	TPST1	78	+	Ambiguous circRNA
chr8	68030482	68049838	CSPP1	80	+	Ambiguous circRNA
chr14	105692405	105693097	BRF1	75	-	Other circRNA
chr13	49742748	49752790	FNDC3A	77	+	Ambiguous circRNA
chr1	87181406	87185318	SH3GLB1	76	+	Other circRNA
chr8	28866588	28876430	HMBOX1	77	+	Ambiguous circRNA
chr6	161469647	161471011	MAP3K4	78	+	Ambiguous circRNA
chr1	22047528	22048257	USP48	77	-	Other circRNA
chr15	28505922	28508315	HERC2	81	-	Other circRNA
chr7	127344892	127361454	SND1	79	+	Other circRNA
chr16	16180680	16184445	ABCC1	76	+	Other circRNA
chr13	42385360	42407667	KIAA0564	78	-	Other circRNA
chr17	1451589	1456443	PITPNA	80	-	Ambiguous circRNA
chr15	76580186	76585041	ETFA	77	-	Other circRNA
chr4	75040222	75091111	MTHFD2L	79	+	Ambiguous circRNA
chr5	14673750	14681716	FAM105B	77	+	Other circRNA
chr12	121853961	121855714	RNF34	75	+	Other circRNA
chrX	134679347	134683730	DDX26B	80	+	Other circRNA
chr7	23015828	23023664	FAM126A	76	-	Ambiguous circRNA
chr3	197541778	197547301	LRCH3	76	+	Other circRNA
chr5	76342171	76344097	AGGF1	72	+	Other circRNA
chr19	12783660	12784130	WDR83	78	+	Ambiguous circRNA
chr4	52729602	52744020	DCUN1D4	78	+	Ambiguous circRNA
chr8	42259305	42260979	VDAC3	70	+	Other circRNA
chr9	4286037	4286523	GLIS3	77	-	Ambiguous circRNA
chr17	5235243	5235447	RABEP1	77	+	Other circRNA
chrX	24024105	24024817	KLHL15	78	-	AUG circRNA
chr9	108467877	108484902	TMEM38B	78	+	Other circRNA
chr17	60106901	60112969	MED13	77	-	Other circRNA
chr12	124904502	124915333	NCOR2	79	-	Other circRNA
chr5	43294157	43297268	HMGCS1	75	-	Other circRNA
chr18	54426095	54448887	WDR7	79	+	Ambiguous circRNA
chr9	79954431	79966362	VPS13A	78	+	Other circRNA
chr3	183479294	183480067	YEATS2	75	+	Other circRNA
chr3	113207791	113225452	SPICE1	78	-	Other circRNA
chr4	170458959	170477246	NEK1	75	-	Other circRNA
chr12	48477373	48491907	SENP1	74	-	Ambiguous circRNA
chr6	629834	637861	EXOC2	76	-	AUG circRNA
chr2	179455865	179465394	LOC100506866	77	+	Other circRNA
chr1	28362054	28384605	EYA3	79	-	Ambiguous circRNA
chr11	108198371	108202764	ATM	75	+	Other circRNA
chr5	167915606	167919852	RARS	76	+	Ambiguous circRNA
chr3	50102463	50103935	RBM6	78	+	Ambiguous circRNA
chr16	71710349	71713438	PHLPP2	78	-	Ambiguous circRNA
chr6	16658006	16753578	ATXN1	77	-	Ambiguous circRNA
chr4	7870348	7873807	AFAP1	79	-	AUG circRNA
chr2	203419974	203421254	BMPR2	74	+	Other circRNA
chr5	43675612	43677908	NNT	77	+	Other circRNA
chr10	126631025	126650977	ZRANB1	77	+	Other circRNA
chrX	16836696	16838378	TXLNG	74	+	Other circRNA
chr20	30380537	30382351	TPX2	76	+	Other circRNA
chr3	50004902	50012825	RBM6	76	+	Ambiguous circRNA
chr9	140705912	140712590	EHMT1	76	+	Other circRNA
chr15	80390757	80415142	ZFAND6	77	+	AUG circRNA
chr8	106431371	106456609	ZFPM2	74	+	Other circRNA
chr15	65266939	65275931	SPG21	74	-	AUG circRNA
chr2	242593960	242608100	ATG4B	75	+	Other circRNA
chr1	41578954	41582682	SCMH1	79	-	Ambiguous circRNA
chr1	89206670	89237562	PKN2	76	+	Other circRNA
chr19	11024552	11027453	CARM1	75	+	Ambiguous circRNA
chr1	21295966	21329301	EIF4G3	74	-	AUG circRNA
chr3	121168161	121206356	POLQ	77	-	Other circRNA
chr19	33096740	33098738	ANKRD27	73	-	Other circRNA
chr22	17979662	17984048	CECR2	76	+	Other circRNA
chr6	158870027	158882761	TULP4	78	+	Other circRNA
chr16	2296095	2296987	ECI1	74	-	Other circRNA
chr4	2951660	2955372	NOP14	74	-	Ambiguous circRNA
chr16	29906579	29907181	SEZ6L2	74	-	Other circRNA
chr1	171537385	171544267	PRRC2C	74	+	Other circRNA
chr3	11399891	11421526	ATG7	77	+	Other circRNA
chr2	206305093	206305396	PARD3B	76	+	Other circRNA
chr1	153637695	153641033	ILF2	73	-	Other circRNA
chr3	171830241	171851336	FNDC3B	77	+	Ambiguous circRNA
chr20	35693826	35696589	RBL1	76	-	Ambiguous circRNA
chr16	14738130	14738466	BFAR	77	+	AUG circRNA
chrX	117528017	117538407	WDR44	73	+	Ambiguous circRNA
chr21	42609439	42629253	BACE2	74	+	Other circRNA
chrX	67731690	67742759	YIPF6	75	+	Other circRNA
chr3	171965322	171969331	FNDC3B	76	+	Other circRNA
chr6	132206070	132207864	ENPP1	74	+	Other circRNA
chr22	45726483	45728591	FAM118A	75	+	Ambiguous circRNA
chr16	50321822	50322261	ADCY7	74	+	AUG circRNA
chr7	102755506	102769239	NAPEPLD	77	-	Ambiguous circRNA
chr7	105121498	105135700	PUS7	75	-	Other circRNA
chr9	138741982	138774924	CAMSAP1	77	-	Ambiguous circRNA
chr15	73468743	73470768	NEO1	74	+	Ambiguous circRNA
chr4	73985878	73991029	ANKRD17	75	-	Other circRNA
chr17	29844668	29844895	RAB11FIP4	74	+	Other circRNA
chr9	97535283	97563284	C9orf3	74	+	Other circRNA
chr2	64800079	64812679	AFTPH	75	+	Other circRNA
chr1	59787207	59812070	FGGY	73	+	Ambiguous circRNA
chr11	57258696	57259335	SLC43A1	76	-	Other circRNA
chr6	17772138	17779330	KIF13A	74	-	Other circRNA
chr1	231090078	231097049	TTC13	74	-	Ambiguous circRNA
chr9	78682870	78686814	PCSK5	74	+	Ambiguous circRNA
chr8	17198871	17206590	MTMR7	73	-	Ambiguous circRNA
chr17	56081011	56082402	SRSF1	72	-	Other circRNA
chr11	18312988	18313566	HPS5	75	-	Other circRNA
chr1	184675776	184681011	EDEM3	75	-	Ambiguous circRNA
chr19	36584932	36590519	WDR62	74	+	Other circRNA
chr4	148886174	148887990	ARHGAP10	72	+	Other circRNA
chr4	128590190	128609022	INTU	73	+	Ambiguous circRNA
chr12	123416738	123419978	ABCB9	73	-	Other circRNA
chr14	75567694	75568468	NEK9	73	-	Other circRNA
chr14	73614502	73640415	PSEN1	76	+	AUG circRNA
chr7	156549086	156619438	LMBR1	71	-	Ambiguous circRNA
chr5	128440648	128442755	ISOC1	74	+	Other circRNA
chr12	112667501	112669519	C12orf51	71	-	Other circRNA
chr3	112968568	112969680	BOC	73	+	AUG circRNA
chr3	57618991	57627474	FAM116A	73	-	Other circRNA
chr1	36204736	36212593	CLSPN	71	-	Other circRNA
chr10	3201105	3202522	PITRM1	74	-	Other circRNA
chr22	38890634	38897285	DDX17	75	-	Other circRNA
chr10	128768965	128798571	DOCK1	71	+	Other circRNA
chr3	12976947	12983365	IQSEC1	74	-	Ambiguous circRNA
chrX	133607388	133632714	HPRT1	75	+	Other circRNA
chr12	108938914	108942990	SART3	73	-	Ambiguous circRNA
chr15	65790201	65804902	DPP8	72	-	Ambiguous circRNA
chr5	59982788	59983054	DEPDC1B	73	-	Ambiguous circRNA
chr6	151330954	151336829	MTHFD1L	72	+	Ambiguous circRNA
chr4	148860975	148887990	ARHGAP10	75	+	Other circRNA
chr10	30629154	30630569	MTPAP	72	-	Other circRNA
chr21	40572144	40574471	BRWD1	70	-	Other circRNA
chr5	14601073	14602441	FAM105A	71	+	Other circRNA
chr7	73100965	73101425	WBSCR22	73	+	Ambiguous circRNA
chr19	11015626	11019883	CARM1	72	+	Ambiguous circRNA
chr14	64465631	64467437	SYNE2	74	+	Other circRNA
chr21	40590077	40590586	BRWD1	73	-	Other circRNA
chr8	141710989	141716304	PTK2	74	-	Other circRNA
chr3	125032151	125032500	ZNF148	70	-	AUG circRNA
chr9	6814630	6893232	KDM4C	73	+	Ambiguous circRNA
chr5	109152973	109159538	MAN2A1	73	+	Other circRNA
chr12	65258447	65260683	TBC1D30	74	+	Other circRNA
chr11	110007387	110008139	ZC3H12C	73	+	Other circRNA
chr14	24735635	24737825	RABGGTA	73	-	Other circRNA
chr16	2378453	2379855	ABCA3	69	-	Other circRNA
chr1	9991948	9995685	LZIC	73	-	Other circRNA
chr17	49294694	49302570	MBTD1	73	-	AUG circRNA
chr20	21335426	21349228	XRN2	71	+	Other circRNA
chr14	73459850	73460065	ZFYVE1	73	-	Other circRNA
chr14	75506613	75509180	MLH3	73	-	Other circRNA
chr6	90564535	90566918	CASP8AP2	71	+	Other circRNA
chr10	35349801	35360267	CUL2	74	-	Ambiguous circRNA
chr8	17446976	17447274	PDGFRL	71	+	Other circRNA
chr5	176618884	176631293	NSD1	74	+	Ambiguous circRNA
chr1	23376879	23385660	KDM1A	73	+	Other circRNA
chr20	56846418	56847931	PPP4R1L	72	-	Other circRNA
chr18	60497267	60497464	PHLPP1	71	+	Other circRNA
chr10	7405839	7423911	SFMBT2	72	-	AUG circRNA
chr18	74561481	74580819	ZNF236	72	+	Ambiguous circRNA
chr6	136709530	136710655	MAP7	70	-	Ambiguous circRNA
chr19	10368897	10369361	MRPL4	72	+	Other circRNA
chr22	29025539	29029962	TTC28	72	-	Other circRNA
chr5	134032815	134033747	SEC24A	70	+	Other circRNA
chr17	78865519	78867665	RPTOR	72	+	Other circRNA
chr2	200233327	200246543	SATB2	72	-	Other circRNA
chr18	39607406	39629569	PIK3C3	70	+	Other circRNA
chr6	99912479	99958106	USP45	71	-	AUG circRNA
chr17	27778472	27778698	TAOK1	71	+	AUG circRNA
chr15	63915013	63916526	HERC1	70	-	Other circRNA
chr1	203676136	203677232	ATP2B4	69	+	Other circRNA
chr15	43120125	43132631	TTBK2	70	-	Other circRNA
chr8	126021212	126021585	SQLE	70	+	Other circRNA
chr7	33397466	33427756	BBS9	71	+	Ambiguous circRNA
chr12	123678932	123682881	MPHOSPH9	69	-	Ambiguous circRNA
chr12	107393328	107393860	CRY1	70	-	Other circRNA
chr3	56600621	56601081	CCDC66	71	+	Ambiguous circRNA
chr21	30677524	30702014	BACH1	70	+	Ambiguous circRNA
chr3	194154500	194175121	ATP13A3	69	-	Other circRNA
chr17	35603741	35609962	ACACA	69	-	Other circRNA
chr19	34818325	34819056	KIAA0355	69	+	Other circRNA
chr20	35689505	35690673	RBL1	67	-	Ambiguous circRNA
chr15	35174702	35178862	AQR	71	-	Other circRNA
chr18	19371334	19383975	MIB1	71	+	Other circRNA
chr13	95813442	95840796	ABCC4	71	-	Other circRNA
chr5	153409048	153414527	FAM114A2	68	-	Ambiguous circRNA
chr6	111726672	111737675	REV3L	71	-	Ambiguous circRNA
chr2	32703702	32707650	BIRC6	71	+	Other circRNA
chr17	41219624	41226538	BRCA1	68	-	Ambiguous circRNA
chr1	36297027	36301594	EIF2C4	68	+	Other circRNA
chr7	76062243	76062964	ZP3	70	+	Other circRNA
chr7	65705311	65706257	TPST1	70	+	AUG circRNA
chr5	54763696	54771278	PPAP2A	71	-	Ambiguous circRNA
chr10	94396940	94399657	KIF11	67	+	Other circRNA
chr5	170336664	170351554	RANBP17	72	+	Ambiguous circRNA
chr16	11873021	11876244	ZC3H7A	71	-	AUG circRNA
chr4	79747190	79772210	BMP2K	69	+	Ambiguous circRNA
chr4	2626988	2628304	FAM193A	71	+	Other circRNA
chr2	42946127	42950175	MTA3	71	+	Other circRNA
chr20	33065576	33067594	ITCH	70	+	Other circRNA
chr1	229602380	229623360	NUP133	71	-	Other circRNA
chr1	82302569	82372915	LPHN2	71	+	AUG circRNA
chr15	50878588	50884823	TRPM7	70	-	Other circRNA
chr2	105912812	105915162	TGFBRAP1	69	-	Ambiguous circRNA
chr1	12359258	12364785	VPS13D	69	+	Other circRNA
chr9	132841908	132854660	GPR107	70	+	Ambiguous circRNA
chr15	100672211	100673520	ADAMTS17	72	-	Other circRNA
chr9	125659557	125659855	RC3H2	70	-	Ambiguous circRNA
chr1	201816406	201817722	IPO9	69	+	Other circRNA
chr16	960930	1004666	LMF1	70	-	Ambiguous circRNA
chr13	98645145	98652899	IPO5	68	+	Other circRNA
chr4	52729602	52758017	DCUN1D4	70	+	Ambiguous circRNA
chr1	44750506	44785416	ERI3	71	-	Ambiguous circRNA
chr3	33725850	33738425	CLASP2	70	-	Other circRNA
chr2	113260488	113260758	TTL	69	+	Other circRNA
chr14	102792321	102793224	ZNF839	68	+	Ambiguous circRNA
chr12	123068824	123069537	KNTC1	68	+	Other circRNA
chr4	151509199	151520283	LRBA	69	-	Other circRNA
chr16	67286444	67286747	SLC9A5	69	+	Ambiguous circRNA
chr1	171492359	171494104	PRRC2C	70	+	Other circRNA
chr6	43529983	43535091	XPO5	68	-	Other circRNA
chr4	1221986	1235307	CTBP1	70	-	AUG circRNA
chr1	237729866	237732619	RYR2	69	+	Other circRNA
chr9	88573386	88577095	NAA35	68	+	Other circRNA
chr16	74949767	74950157	WDR59	69	-	Other circRNA
chr9	88655653	88667506	GOLM1	68	-	Other circRNA
chr17	18195958	18198099	TOP3A	68	-	Other circRNA
chr1	243433393	243471479	SDCCAG8	67	+	Ambiguous circRNA
chr7	50737418	50771605	GRB10	69	-	Ambiguous circRNA
chr11	68115314	68115711	LRP5	69	+	Ambiguous circRNA
chr17	54978779	54981849	TRIM25	68	-	Other circRNA
chr1	40733457	40737707	ZMPSTE24	70	+	Other circRNA
chrX	134679347	134686071	DDX26B	69	+	Other circRNA
chr1	176050287	176105683	RFWD2	68	-	Other circRNA
chr1	15862969	15863309	DNAJC16	67	+	Ambiguous circRNA
chr1	24112164	24112913	PITHD1	66	+	Other circRNA
chr14	31602443	31602881	HECTD1	68	-	Other circRNA
chr6	150147399	150174296	LRP11	68	-	Other circRNA
chr20	47682728	47689234	CSE1L	67	+	Other circRNA
chr3	47079155	47088111	SETD2	68	-	Ambiguous circRNA
chr1	10155518	10165802	UBE4B	71	+	Ambiguous circRNA
chr5	135489280	135489852	SMAD5	70	+	AUG circRNA
chr21	34799190	34805178	IFNGR2	68	+	Other circRNA
chr5	151169883	151170623	G3BP1	66	+	Ambiguous circRNA
chr1	214637972	214638300	PTPN14	70	-	Ambiguous circRNA
chr5	142779220	142780417	NR3C1	70	-	AUG circRNA
chr17	80521229	80529746	FOXK2	69	+	Other circRNA
chr4	87614739	87622954	PTPN13	68	+	Other circRNA
chr22	31998197	31998771	SFI1	68	+	Ambiguous circRNA
chr17	37646809	37649143	CDK12	69	+	Other circRNA
chr19	49699696	49700131	TRPM4	69	+	Other circRNA
chr15	40475914	40477843	BUB1B	69	+	Other circRNA
chr1	180971741	180974599	STX6	69	-	Other circRNA
chr12	110922882	110927976	C12orf24	68	+	Ambiguous circRNA
chr1	153784206	153785928	GATAD2B	67	-	Other circRNA
chr20	62559687	62562375	DNAJC5	67	+	Ambiguous circRNA
chr5	139889221	139889766	ANKHD1|ANKHD1-EIF4EBP3	68	+	Other circRNA
chr6	5368782	5369415	FARS2	68	+	AUG circRNA
chr4	48371865	48385801	SLAIN2	69	+	Other circRNA
chr1	51871576	51874004	EPS15	67	-	Other circRNA
chr1	52981562	52992045	ZCCHC11	70	-	Ambiguous circRNA
chr12	117178149	117178899	RNFT2	67	+	Ambiguous circRNA
chr10	69785302	69804320	HERC4	67	-	Ambiguous circRNA
chr22	47022647	47033857	GRAMD4	68	+	AUG circRNA
chrX	100356046	100364987	CENPI	66	+	AUG circRNA
chr1	100459092	100464971	SLC35A3	66	+	Ambiguous circRNA
chr10	32740519	32762951	CCDC7	67	+	Ambiguous circRNA
chr15	64495280	64508912	CSNK1G1	67	-	Ambiguous circRNA
chr6	128643183	128643455	PTPRK	68	-	Other circRNA
chr19	41798149	41798416	HNRNPUL1	66	+	Other circRNA
chr15	43164808	43170882	TTBK2	68	-	AUG circRNA
chr17	5983690	5998543	WSCD1	68	+	AUG circRNA
chr16	70294946	70296427	AARS	67	-	Other circRNA
chrX	37892786	37893261	SYTL5	69	+	AUG circRNA
chr12	120588948	120589195	GCN1L1	66	-	Other circRNA
chr3	185638891	185641772	TRA2B	66	-	Ambiguous circRNA
chr12	95451328	95451654	NR2C1	66	-	Other circRNA
chr1	24140679	24147083	HMGCL	66	-	Ambiguous circRNA
chr1	213302869	213349835	RPS6KC1	68	+	Ambiguous circRNA
chrX	117718697	117724265	DOCK11	65	+	Other circRNA
chr22	31858917	31859119	EIF4ENIF1	66	-	Other circRNA
chr5	107684099	107703654	FBXL17	68	-	Ambiguous circRNA
chr3	4452548	4461830	SUMF1	68	-	Ambiguous circRNA
chr11	34991685	35006275	PDHX	66	+	Other circRNA
chr5	72285253	72286691	FCHO2	67	+	Other circRNA
chr13	114164552	114175048	TMCO3	68	+	Other circRNA
chr20	35236117	35238133	TGIF2-C20ORF24|C20orf24	64	+	Ambiguous circRNA
chr1	210573811	210591669	HHAT	67	+	Other circRNA
chr18	74561481	74587620	ZNF236	65	+	Ambiguous circRNA
chr16	70594371	70597953	SF3B3	66	+	Other circRNA
chr2	10559859	10560261	HPCAL1	67	+	Ambiguous circRNA
chr9	88190229	88211364	AGTPBP1	65	-	Other circRNA
chr11	3712576	3714605	NUP98	65	-	Other circRNA
chr12	110832905	110834257	ANAPC7	66	-	Other circRNA
chr6	101214440	101296583	ASCC3	68	-	Ambiguous circRNA
chr16	18860538	18861789	SMG1	65	-	Ambiguous circRNA
chr12	56604080	56604352	RNF41	66	-	Ambiguous circRNA
chr3	129546645	129547351	TMCC1	64	-	AUG circRNA
chr17	29483000	29509683	NF1	67	+	Other circRNA
chr4	88959402	88973310	PKD2	64	+	Other circRNA
chr12	112707507	112711599	C12orf51	66	-	Ambiguous circRNA
chr2	32716491	32718734	BIRC6	65	+	Other circRNA
chr10	74100546	74100928	DNAJB12	64	-	Other circRNA
chr20	3888572	3893281	PANK2	65	+	Ambiguous circRNA
chr1	32650125	32653725	TXLNA	64	+	Other circRNA
chr4	83799882	83803093	SEC31A	67	-	AUG circRNA
chr3	44496612	44497188	ZNF445	66	-	AUG circRNA
chr5	37243114	37247847	C5orf42	66	-	AUG circRNA
chr7	92118606	92119225	PEX1	67	-	Other circRNA
chr14	61262934	61285565	MNAT1	67	+	Other circRNA
chr7	42187824	42262894	GLI3	66	-	AUG circRNA
chr21	32537278	32567621	TIAM1	66	-	Other circRNA
chr12	100166699	100175875	ANKS1B	66	-	Other circRNA
chr6	150157220	150174296	LRP11	66	-	Other circRNA
chr8	141745349	141762415	PTK2	65	-	Ambiguous circRNA
chr9	131271154	131277918	GLE1	65	+	Ambiguous circRNA
chr5	68400457	68410323	SLC30A5	64	+	Other circRNA
chr4	73950965	73958017	ANKRD17	62	-	Other circRNA
chr2	160599571	160602448	MARCH7	63	+	Other circRNA
chrX	109414647	109416681	TMEM164	66	+	Other circRNA
chr10	69647174	69651312	SIRT1	64	+	Ambiguous circRNA
chr9	19356969	19358158	DENND4C	64	+	Other circRNA
chr6	35586872	35610620	FKBP5	67	-	AUG circRNA
chr1	21306826	21307720	EIF4G3	66	-	Other circRNA
chr14	64465631	64489581	SYNE2	62	+	Other circRNA
chr22	46829289	46835308	CELSR1	65	-	Other circRNA
chr22	46085591	46125470	ATXN10	65	+	Ambiguous circRNA
chr17	5365638	5365866	DHX33	63	-	Ambiguous circRNA
chr17	57842331	57851246	VMP1	66	+	Ambiguous circRNA
chr8	68005777	68007967	CSPP1	64	+	Ambiguous circRNA
chr4	30921774	30951837	PCDH7	66	+	Other circRNA
chr13	114174930	114193822	TMCO3	63	+	Other circRNA
chr19	40964061	40964452	BLVRB	64	-	Other circRNA
chrX	24190831	24197887	ZFX	65	+	AUG circRNA
chr5	134032815	134039622	SEC24A	63	+	Other circRNA
chr6	42643793	42647570	UBR2	63	+	Other circRNA
chr7	73654267	73663448	RFC2	64	-	Other circRNA
chr4	25153581	25160729	SEPSECS	65	-	Other circRNA
chr1	40422758	40424497	MFSD2A	63	+	Ambiguous circRNA
chr12	1345934	1372331	ERC1	65	+	Ambiguous circRNA
chr2	24357988	24369956	LOC375190	63	+	Ambiguous circRNA
chr4	38055819	38104778	TBC1D1	64	+	Other circRNA
chr3	50137414	50143142	RBM5	64	+	Ambiguous circRNA
chr4	87967317	87968746	AFF1	64	+	Other circRNA
chr17	4856089	4857140	ENO3	60	+	Ambiguous circRNA
chr5	40728446	40730445	TTC33	63	-	Other circRNA
chr12	118511503	118511797	VSIG10	64	-	Other circRNA
chr16	70598967	70601439	SF3B3	64	+	Other circRNA
chr11	108172374	108175579	ATM	65	+	Other circRNA
chr15	41648236	41657787	NUSAP1	61	+	Ambiguous circRNA
chr1	26581661	26582356	CEP85	61	+	Other circRNA
chr6	43523572	43535091	XPO5	64	-	Other circRNA
chr4	37633006	37636745	RELL1	64	-	Other circRNA
chr1	44750506	44804994	ERI3	65	-	Ambiguous circRNA
chr17	37880978	37882106	ERBB2	64	+	Other circRNA
chr11	6962801	6977013	ZNF215	62	+	Other circRNA
chr9	127300370	127302466	NR6A1	64	-	Other circRNA
chr3	183361267	183369064	KLHL24	62	+	AUG circRNA
chr1	201823722	201828122	IPO9	62	+	Other circRNA
chr3	138289159	138291774	CEP70	64	-	AUG circRNA
chr10	31661946	31676727	ZEB1	64	+	Ambiguous circRNA
chr3	138340248	138341258	FAIM	63	+	Ambiguous circRNA
chr7	2403266	2404164	EIF3B	61	+	Ambiguous circRNA
chr12	57927735	57928235	DCTN2	60	-	Other circRNA
chr8	109462051	109468159	TTC35	62	+	Other circRNA
chr22	29517344	29521404	KREMEN1	63	+	Other circRNA
chr9	125932180	125946577	STRBP	61	-	Ambiguous circRNA
chr7	102944288	102944937	PMPCB	60	+	Other circRNA
chr15	28491026	28493882	HERC2	62	-	Other circRNA
chr1	11130956	11137005	EXOSC10	64	-	Other circRNA
chr18	42281139	42281797	SETBP1	62	+	AUG circRNA
chr7	148851036	148851432	ZNF398	61	+	Ambiguous circRNA
chr4	83787960	83788469	SEC31A	63	-	Other circRNA
chr5	78936673	78964851	PAPD4	64	+	Other circRNA
chr2	109408130	109473426	CCDC138	62	+	Other circRNA
chr8	124243539	124243997	C8orf76|ZHX1-C8ORF76	61	-	Other circRNA
chr16	14687157	14698083	PARN	63	-	Other circRNA
chr12	105303432	105322472	SLC41A2	61	-	AUG circRNA
chr12	42748962	42792796	PPHLN1	62	+	Ambiguous circRNA
chr8	37704371	37704693	BRF2	61	-	Other circRNA
chr17	2929301	2930364	RAP1GAP2	60	+	Other circRNA
chr5	137342678	137354835	FAM13B	63	-	AUG circRNA
chr14	31139461	31144271	SCFD1	64	+	Other circRNA
chr1	35881066	35881315	ZMYM4	61	+	Other circRNA
chr2	165378489	165383645	GRB14	63	-	Other circRNA
chr1	47725960	47737913	STIL	61	-	Other circRNA
chr11	85707868	85714494	PICALM	61	-	Ambiguous circRNA
chr12	6630963	6631203	NCAPD2	60	+	Other circRNA
chr1	26774049	26786635	DHDDS	62	+	Other circRNA
chr10	74474868	74475660	MCU	61	+	Other circRNA
chr1	225140371	225211567	DNAH14	64	+	AUG circRNA
chr15	58284902	58306479	ALDH1A2	62	-	Other circRNA
chr17	62515438	62519013	CEP95	61	+	Ambiguous circRNA
chr9	33953282	33973235	UBAP2	61	-	Other circRNA
chr20	33315062	33324562	NCOA6	62	-	Other circRNA
chr1	233489552	233490757	KIAA1804	61	+	Other circRNA
chr6	155108994	155116273	SCAF8	63	+	Other circRNA
chr11	108200940	108202764	ATM	60	+	Other circRNA
chr14	37754522	37838829	MIPOL1	63	+	Ambiguous circRNA
chr15	41648236	41669502	NUSAP1	58	+	Ambiguous circRNA
chr2	46203567	46211819	PRKCE	62	+	Other circRNA
chr11	68272612	68305359	PPP6R3	61	+	AUG circRNA
chr1	220934999	220943898	MARC2	60	+	Other circRNA
chr3	63884074	63938159	ATXN7	60	+	AUG circRNA
chr3	180665652	180667131	FXR1	62	+	Ambiguous circRNA
chr13	30854199	30857928	KATNAL1	61	-	AUG circRNA
chr18	67788791	67795782	RTTN	61	-	Ambiguous circRNA
chr17	5268416	5271763	RABEP1	63	+	Other circRNA
chr11	119144577	119145663	CBL	60	+	Other circRNA
chr8	120814033	120843961	TAF2	61	-	Other circRNA
chr7	140034228	140037149	SLC37A3	61	-	Other circRNA
chr9	140646782	140652463	EHMT1	60	+	Other circRNA
chr20	3274784	3275275	C20orf194	60	-	Other circRNA
chr21	34120809	34127664	GCFC1	61	-	Ambiguous circRNA
chr22	32007128	32007826	SFI1	58	+	Ambiguous circRNA
chr5	122881110	122881535	CSNK1G3	60	+	AUG circRNA
chr17	11984672	11999011	MAP2K4	64	+	Ambiguous circRNA
chr10	7325865	7327916	SFMBT2	60	-	Other circRNA
chr19	58805463	58806947	ZNF8	58	+	Other circRNA
chr5	127466758	127477673	SLC12A2	59	+	Ambiguous circRNA
chr12	22643056	22659753	KIAA0528	61	-	Other circRNA
chr12	56997142	56999111	BAZ2A	61	-	Other circRNA
chr18	34646852	34647508	KIAA1328	61	+	Ambiguous circRNA
chr9	88307603	88327481	AGTPBP1	60	-	AUG circRNA
chr22	22153300	22162135	MAPK1	62	-	Other circRNA
chr12	133324417	133331719	ANKLE2	63	-	Ambiguous circRNA
chr16	148142	150507	NPRL3	59	-	Ambiguous circRNA
chr9	134381500	134382901	POMT1	59	+	Ambiguous circRNA
chr5	180668491	180669345	GNB2L1	60	-	Ambiguous circRNA
chr20	35672488	35675593	RBL1	61	-	Other circRNA
chr11	34111725	34113603	CAPRIN1	61	+	Other circRNA
chr1	179316734	179319566	SOAT1	60	+	Other circRNA
chr12	43846076	43847855	ADAMTS20	60	-	Other circRNA
chr1	93029198	93101893	EVI5	62	-	Other circRNA
chr2	61722589	61727029	XPO1	60	-	Ambiguous circRNA
chr15	91312362	91312816	BLM	60	+	Other circRNA
chr5	37333564	37341344	NUP155	59	-	Other circRNA
chr17	3984669	3989949	ZZEF1	60	-	Other circRNA
chr16	11940357	11941663	RSL1D1	60	-	Ambiguous circRNA
chr6	76412360	76421132	SENP6	61	+	Other circRNA
chr17	45734225	45736026	KPNB1	61	+	Ambiguous circRNA
chr3	16327848	16345099	OXNAD1	62	+	Other circRNA
chr20	47591302	47592736	ARFGEF2	59	+	Other circRNA
chr3	196842797	196846401	DLG1	62	-	Ambiguous circRNA
chr20	5948081	5948671	MCM8	60	+	Other circRNA
chr16	11063017	11076848	CLEC16A	58	+	Other circRNA
chr10	94653105	94659401	EXOC6	59	+	Other circRNA
chr1	26594973	26596105	CEP85	59	+	Other circRNA
chr2	85595808	85598685	ELMOD3	57	+	Ambiguous circRNA
chr7	138203933	138235925	TRIM24	59	+	Other circRNA
chr17	18110128	18111689	ALKBH5	60	+	Other circRNA
chr14	81329100	81372425	CEP128	60	-	Other circRNA
chr3	52964344	52966324	SFMBT1	59	-	Other circRNA
chr21	38792600	38802702	DYRK1A	62	+	Ambiguous circRNA
chrX	73048902	73053209	XIST	61	-	Other circRNA
chr6	99951640	99958106	USP45	58	-	AUG circRNA
chr1	234582548	234586312	TARBP1	58	-	Other circRNA
chr3	50142509	50143142	RBM5	60	+	Other circRNA
chr4	42065002	42069209	SLC30A9	57	+	Other circRNA
chr3	196807921	196846401	DLG1	61	-	Ambiguous circRNA
chr1	40654726	40661436	RLF	59	+	Other circRNA
chr7	24659670	24690331	MPP6	62	+	AUG circRNA
chr3	119582265	119624699	GSK3B	59	-	Other circRNA
chr17	27248705	27254081	PHF12	56	-	Ambiguous circRNA
chrX	19475030	19482524	MAP3K15	60	-	Ambiguous circRNA
chr19	19750893	19751380	GMIP	61	-	Other circRNA
chr16	89371613	89383483	ANKRD11	59	-	AUG circRNA
chr13	113158345	113181798	TUBGCP3	59	-	Other circRNA
chr14	31596990	31641328	HECTD1	56	-	Other circRNA
chr10	128768965	128788867	DOCK1	60	+	Other circRNA
chr19	47542293	47542822	NPAS1	59	+	Other circRNA
chr17	30315338	30315516	SUZ12	59	+	Other circRNA
chr12	50488219	50490755	SMARCD1	58	+	Other circRNA
chr3	126445920	126452065	CHCHD6	61	+	Other circRNA
chr20	33077070	33080402	ITCH	60	+	Other circRNA
chr3	47147486	47158244	SETD2	57	-	Other circRNA
chr12	110778463	110780253	ATP2A2	61	+	Other circRNA
chr2	24042616	24046439	ATAD2B	59	-	Ambiguous circRNA
chr1	6291961	6292179	ICMT	59	-	Other circRNA
chr12	112096539	112097149	BRAP	59	-	Other circRNA
chr19	4408899	4409756	CHAF1A	58	+	Other circRNA
chr5	56542126	56543042	GPBP1	58	+	Ambiguous circRNA
chr4	154191486	154197282	TRIM2	59	+	Other circRNA
chr22	42289120	42290941	SREBF2	58	+	Ambiguous circRNA
chr13	76134888	76143643	UCHL3	60	+	Other circRNA
chr6	43533396	43535091	XPO5	58	-	Other circRNA
chr17	61655830	61657304	DCAF7	58	+	Ambiguous circRNA
chr5	79974745	80040434	MSH3	59	+	Other circRNA
chr3	122156016	122160963	KPNA1	60	-	Other circRNA
chr16	66971939	66973261	CES2	58	+	Ambiguous circRNA
chr20	32617574	32619410	RALY	61	+	Other circRNA
chr8	28827559	28828036	HMBOX1	57	+	Ambiguous circRNA
chr3	44835708	44835918	KIF15	58	+	Other circRNA
chr17	80141649	80146295	CCDC57	58	-	Other circRNA
chr10	93756125	93757508	BTAF1	58	+	Other circRNA
chr13	95813442	95822882	ABCC4	61	-	Other circRNA
chr2	61725807	61727029	XPO1	59	-	Ambiguous circRNA
chr1	14057494	14075982	PRDM2	59	+	Other circRNA
chr7	22999874	23030758	FAM126A	60	-	AUG circRNA
chr12	112676855	112677831	C12orf51	58	-	Other circRNA
chr12	19615443	19653155	AEBP2	58	+	Ambiguous circRNA
chr7	128637442	128641288	TNPO3	58	-	Other circRNA
chrX	37245851	37285253	PRRG1	57	+	AUG circRNA
chr19	40761064	40762961	AKT2	59	-	Ambiguous circRNA
chr1	58971731	59000003	OMA1	58	-	Other circRNA
chr8	80830212	80831383	MRPS28|TPD52	56	-	Ambiguous circRNA
chr9	79952170	79986065	VPS13A	59	+	Other circRNA
chr17	526772	530556	VPS53	59	-	Ambiguous circRNA
chr16	23091266	23093878	USP31	60	-	Other circRNA
chr19	13919649	13920034	ZSWIM4	59	+	Other circRNA
chr7	148543588	148544397	EZH2	59	-	AUG circRNA
chrX	117530932	117538407	WDR44	56	+	Other circRNA
chr3	155628480	155632359	GMPS	58	+	Other circRNA
chr9	79968324	79972754	VPS13A	58	+	Other circRNA
chr11	47187818	47189802	ARFGAP2	58	-	Other circRNA
chr2	73777393	73786269	ALMS1	57	+	Other circRNA
chr19	52380534	52384130	ZNF577	59	-	Ambiguous circRNA
chr21	35475133	35497780	MRPS6	58	+	Other circRNA
chr11	3794861	3797251	NUP98	58	-	Other circRNA
chr5	73045661	73049027	RGNEF	57	+	Other circRNA
chr12	29904598	29911710	TMTC1	59	-	Other circRNA
chr13	20638590	20657172	ZMYM2	56	+	Other circRNA
chr15	102241288	102255166	TARSL2	57	-	Ambiguous circRNA
chr4	88104354	88116842	KLHL8	56	-	AUG circRNA
chr12	45097508	45108524	NELL2	59	-	Other circRNA
chr3	169854206	169863309	PHC3	56	-	Other circRNA
chr2	30785011	30791042	LCLAT1	58	+	Ambiguous circRNA
chr15	92459222	92459688	SLCO3A1	58	+	Ambiguous circRNA
chr19	47421744	47425613	ARHGAP35	59	+	AUG circRNA
chr2	64796225	64800202	AFTPH	56	+	Other circRNA
chr3	13393378	13395607	NUP210	57	-	Other circRNA
chr7	158528193	158531812	ESYT2	57	-	Ambiguous circRNA
chr1	186287578	186287960	TPR	59	-	Other circRNA
chr3	186509513	186522513	RFC4	56	-	AUG circRNA
chr19	14066723	14067334	DCAF15	56	+	Other circRNA
chr17	45740454	45752148	KPNB1	57	+	Other circRNA
chr1	236966727	236969533	MTR	56	+	Ambiguous circRNA
chr5	118576113	118580271	DMXL1	57	+	Ambiguous circRNA
chr5	134033588	134039622	SEC24A	57	+	Other circRNA
chr5	14293120	14304701	TRIO	58	+	Ambiguous circRNA
chr6	38545375	38565897	BTBD9	58	-	AUG circRNA
chr1	201826223	201828122	IPO9	55	+	Other circRNA
chr15	100821433	100871259	ADAMTS17	58	-	Ambiguous circRNA
chr18	32236204	32259556	DTNA	55	+	Other circRNA
chr2	29356520	29368233	CLIP4	54	+	Ambiguous circRNA
chr20	2097311	2098061	STK35	57	+	Other circRNA
chr2	162036124	162061304	TANK	57	+	AUG circRNA
chr15	90984737	90986710	IQGAP1	57	+	Other circRNA
chr8	48203621	48206619	KIAA0146	58	+	Ambiguous circRNA
chr5	132227855	132232932	AFF4	55	-	Other circRNA
chr19	33406242	33409245	CEP89	57	-	Ambiguous circRNA
[truncated: 17,279 more rows]
